# Supplementary material for: Inhibition of cytotoxic self-assembly of HEWL through promoting fibrillation by new synthesized α-hydroxycarbamoylphosphinic acids
Source: Royal Society of Chemistry journal article supplement (doi:10.1039/d4ra02969k), 2024-01-01
Supplement: d4ra02969k1.pdf [file d4ra02969k1.pdf]

## Supporting Information

### Inhibition of Cytotoxic Self-assembly of HEWL Through Promoting Fibrillation by New Synthesized $\alpha$ -Hydroxycarbamoylphosphinic Acids

Mohsen Mahdavimehr<sup>a</sup>, Babak Kaboudin<sup>b\*</sup>, Saied Alaie<sup>b</sup>, Farimah Tondkar<sup>a</sup>, Zahra Mahmoudi Eshkaftaki<sup>a</sup>, Mohammad-Bagher Ebrahim-Habibi<sup>c</sup>, Mojtaba Ghashghae<sup>b</sup>, Elham Tahmasebi<sup>b</sup>, Tianjian Zhang<sup>d</sup>, Yanlong Gu<sup>d</sup>, Ali Akbar Meratan<sup>a\*</sup>

<sup>1</sup> Department of Biological Sciences, Institute for Advanced Studies in Basic Sciences (IASBS), Zanjan, 45137-66731, Iran

<sup>2</sup> Department of Chemistry, Institute for Advanced Studies in Basic Sciences (IASBS), Zanjan 45137-66731, Iran

<sup>3</sup> Microbiology and Biotechnology Group, Research Institute of Petroleum Industry, Tehran, Iran

<sup>4</sup> School of Chemistry and Chemical Engineering, Huazhong University of Science & Technology, Wuhan 430074, China

\* Corresponding authors

Babak kaboudin; E-mail: [kaboudin@gmail.com](mailto:kaboudin@gmail.com)

Ali Akbar Meratan; E-mail: [a.meratan@iasbs.ac.ir](mailto:a.meratan@iasbs.ac.ir); [a.meratan@gmail.com](mailto:a.meratan@gmail.com)

## Table of Contents

**NMR Spectra for the compounds 3a-3n**

**S1-S33**

**Figure S1:  $^1\text{H}$  NMR Spectra of 3a**

**Figure S2:  $^{13}\text{C}$  NMR Spectra of 3a**

**Figure S3:  $^{31}\text{P}$  NMR Spectra of 3a**

**Figure S4:  $^1\text{H}$  NMR Spectra of 3b**

**Figure S5:  $^{13}\text{C}$  NMR Spectra of 3b**

**Figure S6:  $^{31}\text{P}$  NMR Spectra of 3b**

**Figure S7:  $^1\text{H}$  NMR Spectra of 3c**

**Figure S8:  $^{13}\text{C}$  NMR Spectra of 3c**

**Figure S9:  $^{31}\text{P}$  NMR Spectra of 3c**

**Figure S10:  $^1\text{H}$  NMR Spectra of 3d**

**Figure S11:  $^{13}\text{C}$  NMR Spectra of 3d**

**Figure S12:  $^{31}\text{P}$  NMR Spectra of 3d**

**Figure S13:  $^1\text{H}$  NMR Spectra of 3e**

**Figure S14:  $^{13}\text{C}$  NMR Spectra of 3e**

**Figure S15:  $^{31}\text{P}$  NMR Spectra of 3e**

**Figure S16:  $^1\text{H}$  NMR Spectra of 3f**

**Figure S17:  $^{13}\text{C}$  NMR Spectra of 3f**

**Figure S18:  $^{31}\text{P}$  NMR Spectra of 3f**

**Figure S19:  $^1\text{H}$  NMR Spectra of 3g**

**Figure S20:  $^{13}\text{C}$  NMR Spectra of 3g**

**Figure S21:  $^{31}\text{P}$  NMR Spectra of 3g**

**Figure S22:  $^1\text{H}$  NMR Spectra of 3h**

**Figure S23:  $^{13}\text{C}$  NMR Spectra of 3h**

**Figure S24:  $^{31}\text{P}$  NMR Spectra of 3h**

**Figure S25:  $^1\text{H}$  NMR Spectra of 3i**

**Figure S26:  $^{13}\text{C}$  NMR Spectra of 3i**

**Figure S27:  $^{31}\text{P}$  NMR Spectra of 3i**

**Figure S28:  $^1\text{H}$  NMR Spectra of 3j**

**Figure S29:  $^{13}\text{C}$  NMR Spectra of 3j**

**Figure S30:  $^{31}\text{P}$  NMR Spectra of 3j**

**Figure S31:  $^1\text{H}$  NMR Spectra of 3k**

**Figure S32:  $^{13}\text{C}$  NMR Spectra of 3k**

**Figure S33:  $^{31}\text{P}$  NMR Spectra of 3k**

**LC-MS Spectra for the compounds 3a-3k**

**S34-S44**

**Figure S34: LCMS of 3a**

**Figure S35: LCMS of 3b**

**Figure S36: LCMS of 3c**

**Figure S37: LCMS of 3d**

**Figure S38: LCMS of 3e**

**Figure S39: LCMS of 3f**

**Figure S40: LCMS of 3g**

**Figure S41: LCMS of 3h**

**Figure S42: LCMS of 3i**

**Figure S43: LCMS of 3j**

**Figure S44: LCMS of 3k**

**Figure S45: HPLC-UV chromatograms of 50 mg L<sup>-1</sup> solutions of the compounds**

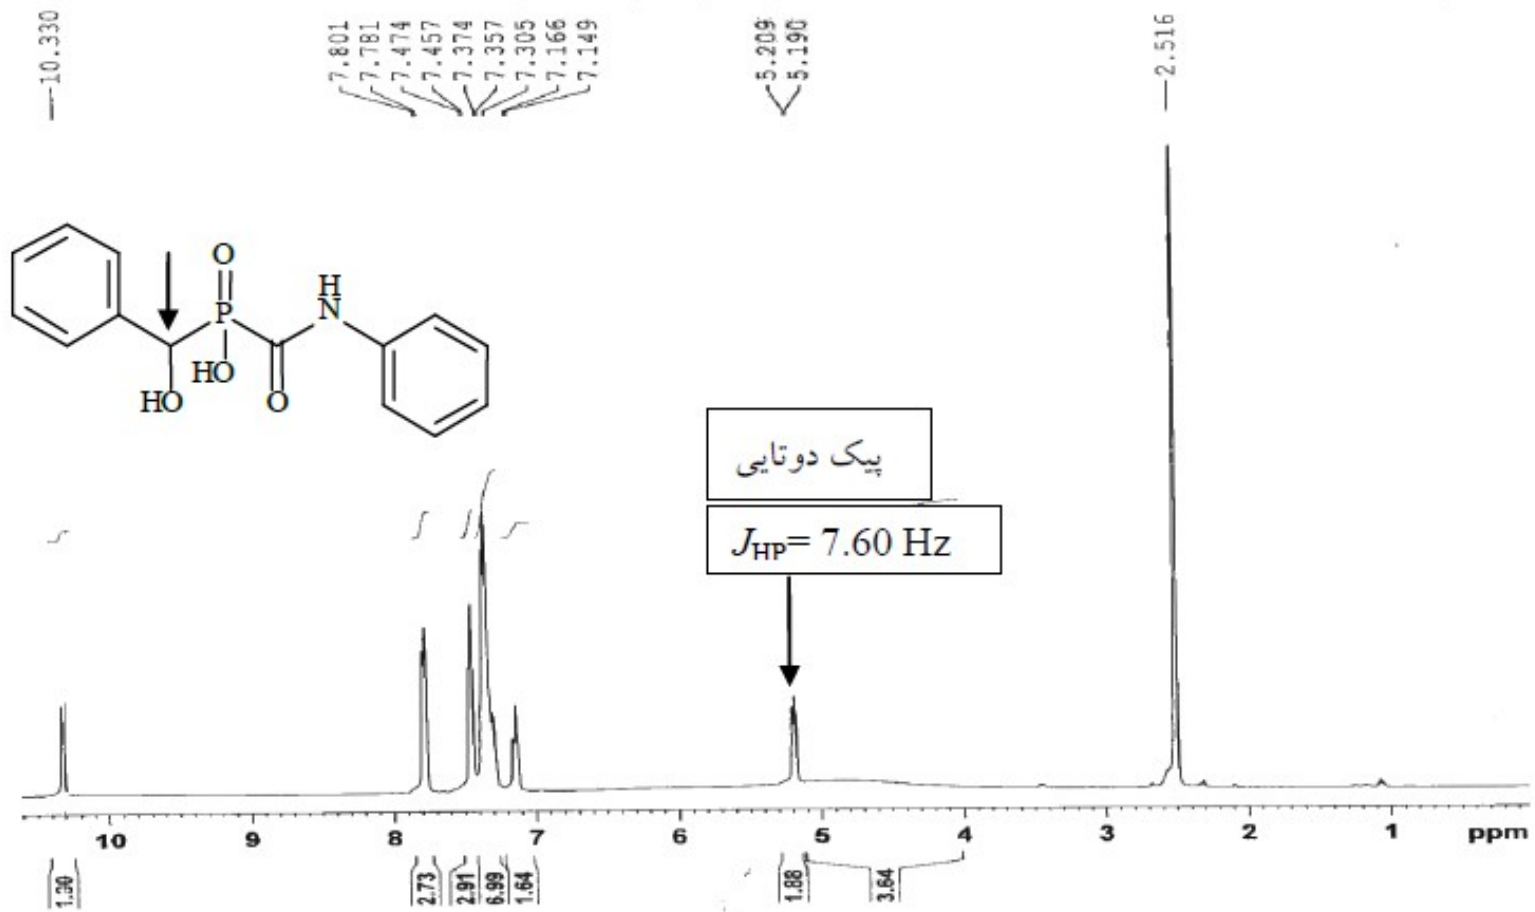

Figure S1:  $^1\text{H}$  NMR Spectra of 3a

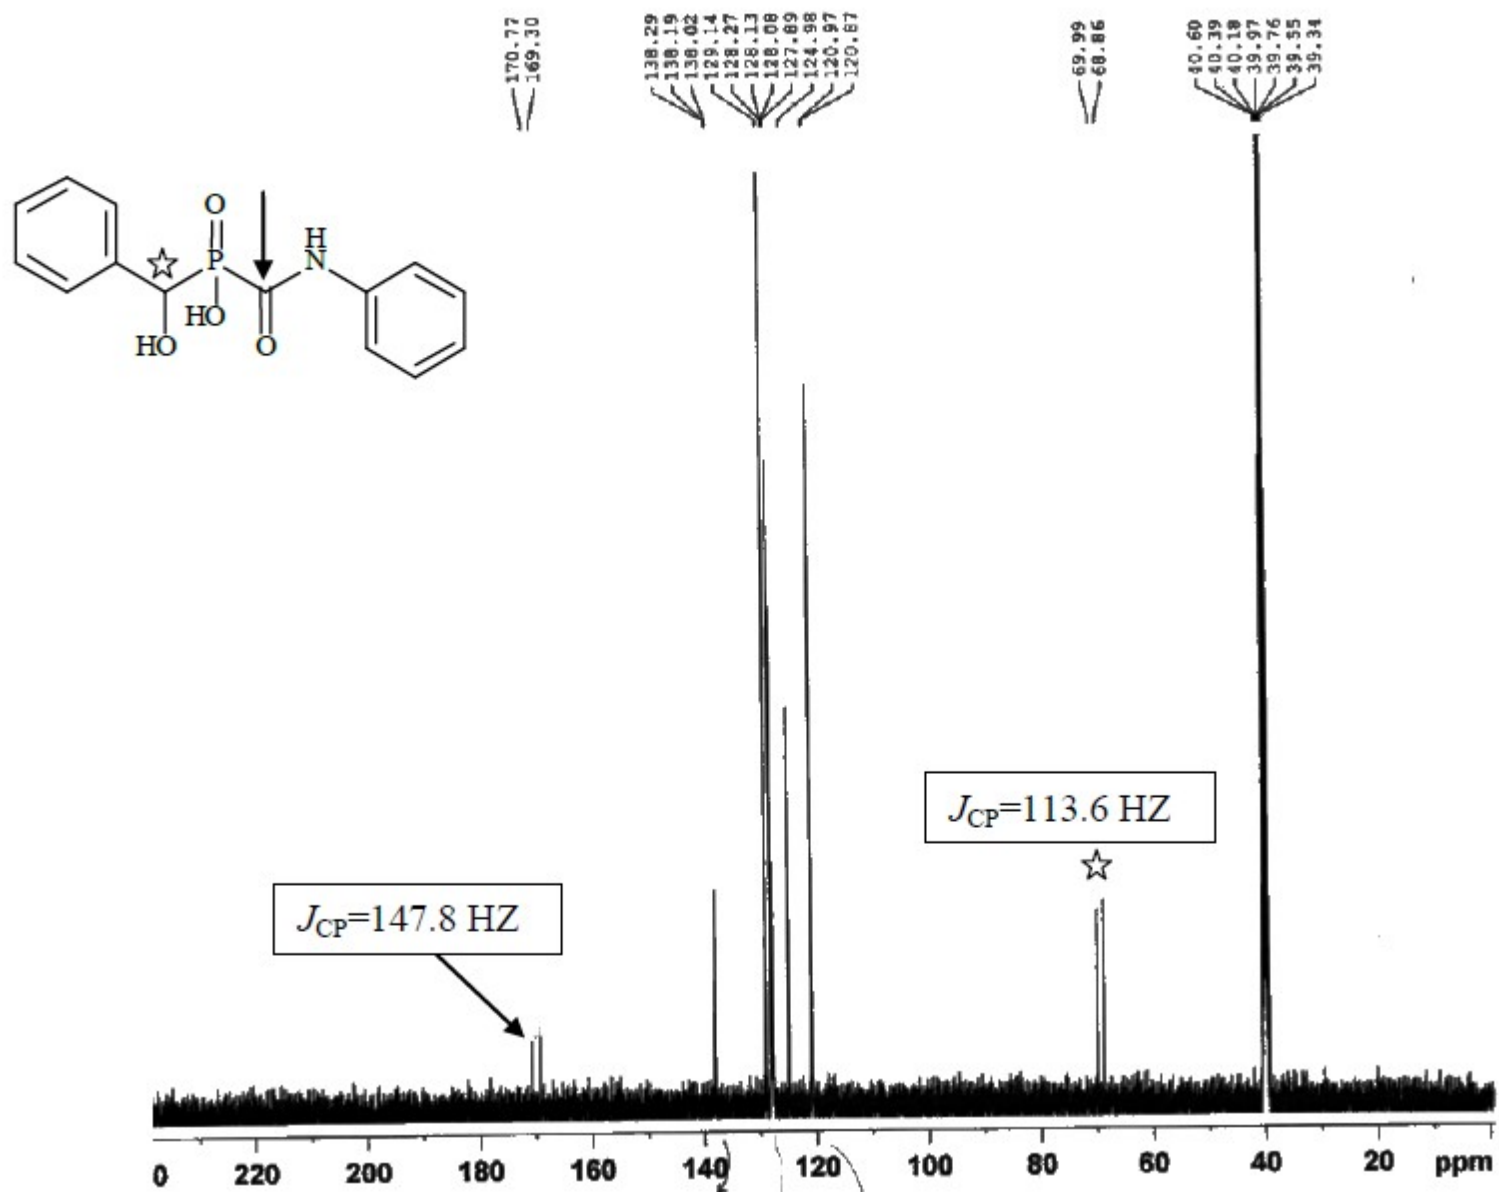

Figure S2:  $^{13}\text{C}$  NMR Spectra of 3a

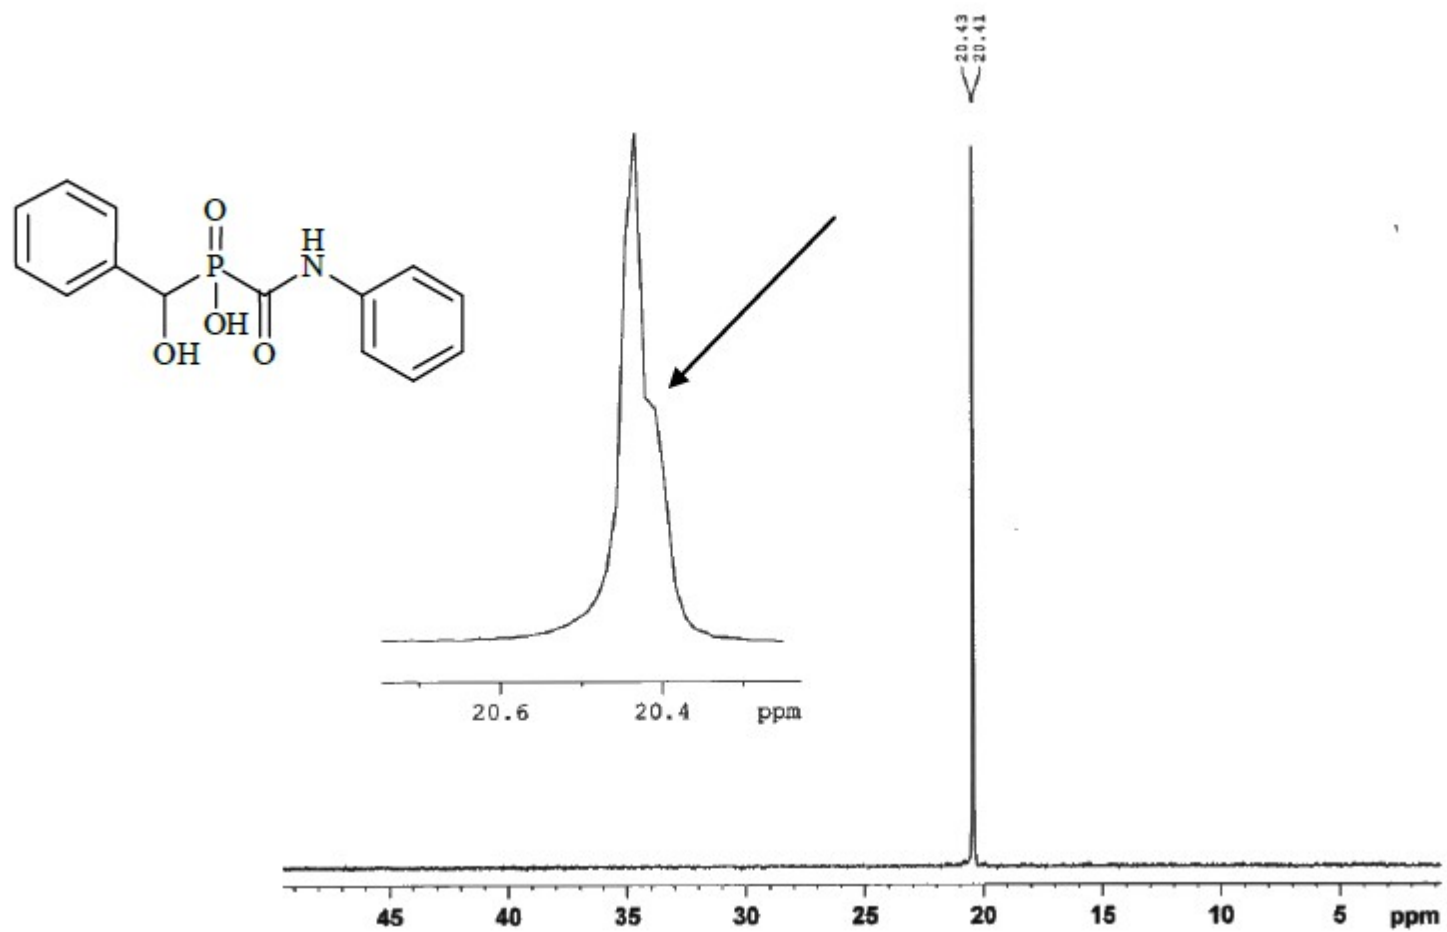

Figure S3:  $^{31}\text{P}$  NMR Spectra of 3a

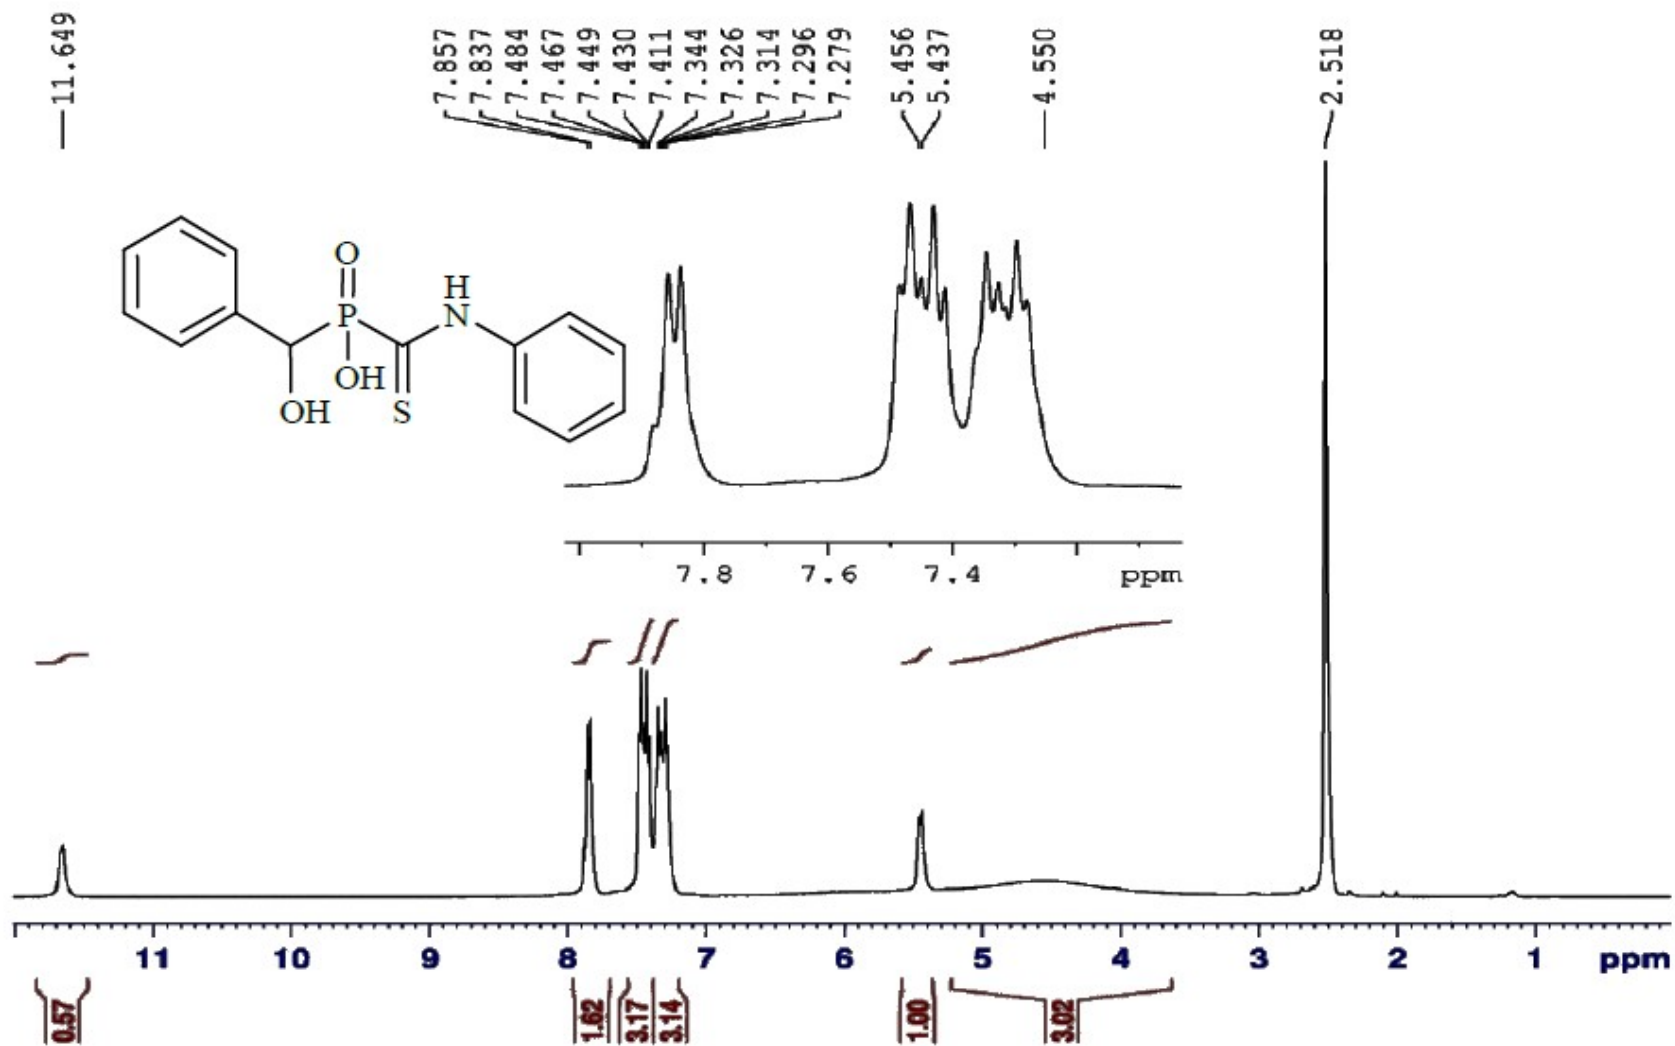

Figure S4: <sup>1</sup>H NMR Spectra of 3b



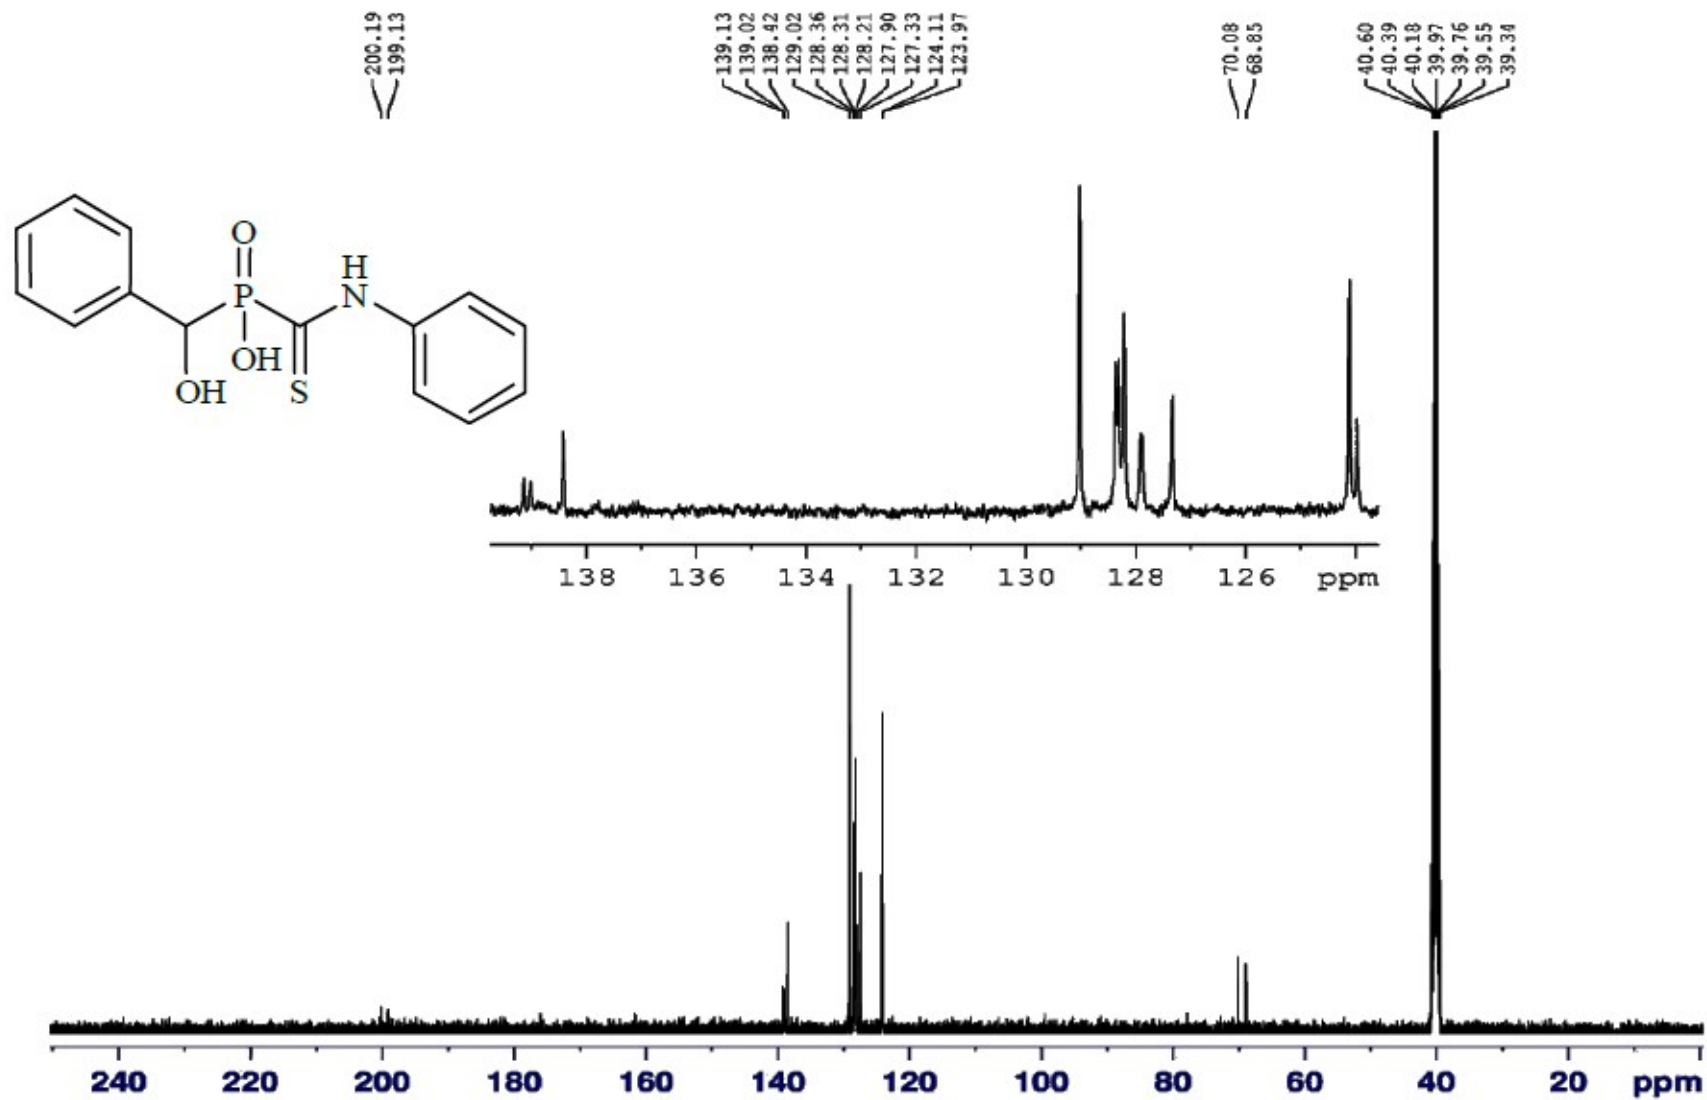

Figure S5: <sup>13</sup>C NMR Spectra of 3b

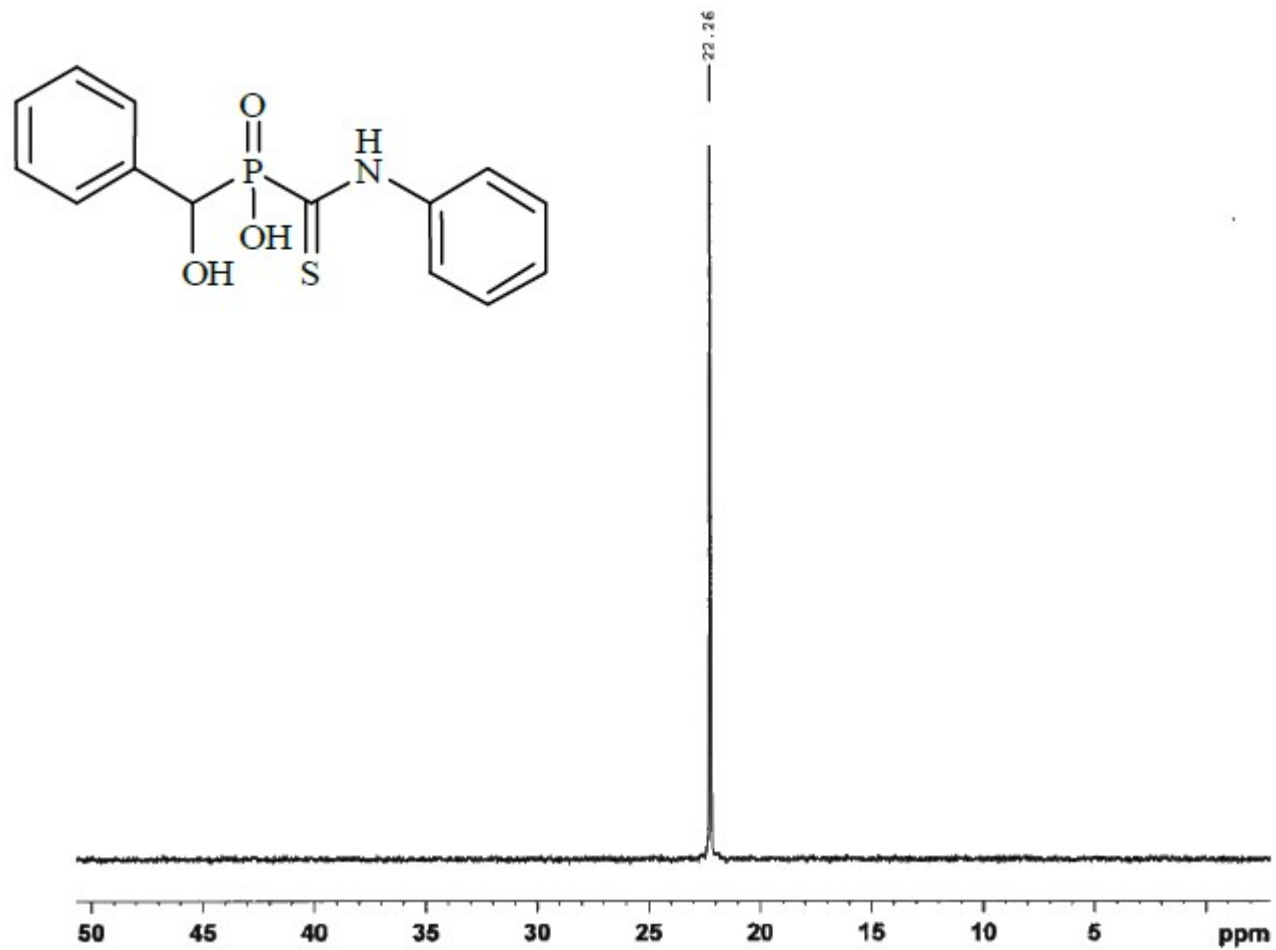

Figure S6:  $^{31}\text{P}$  NMR Spectra of 3b

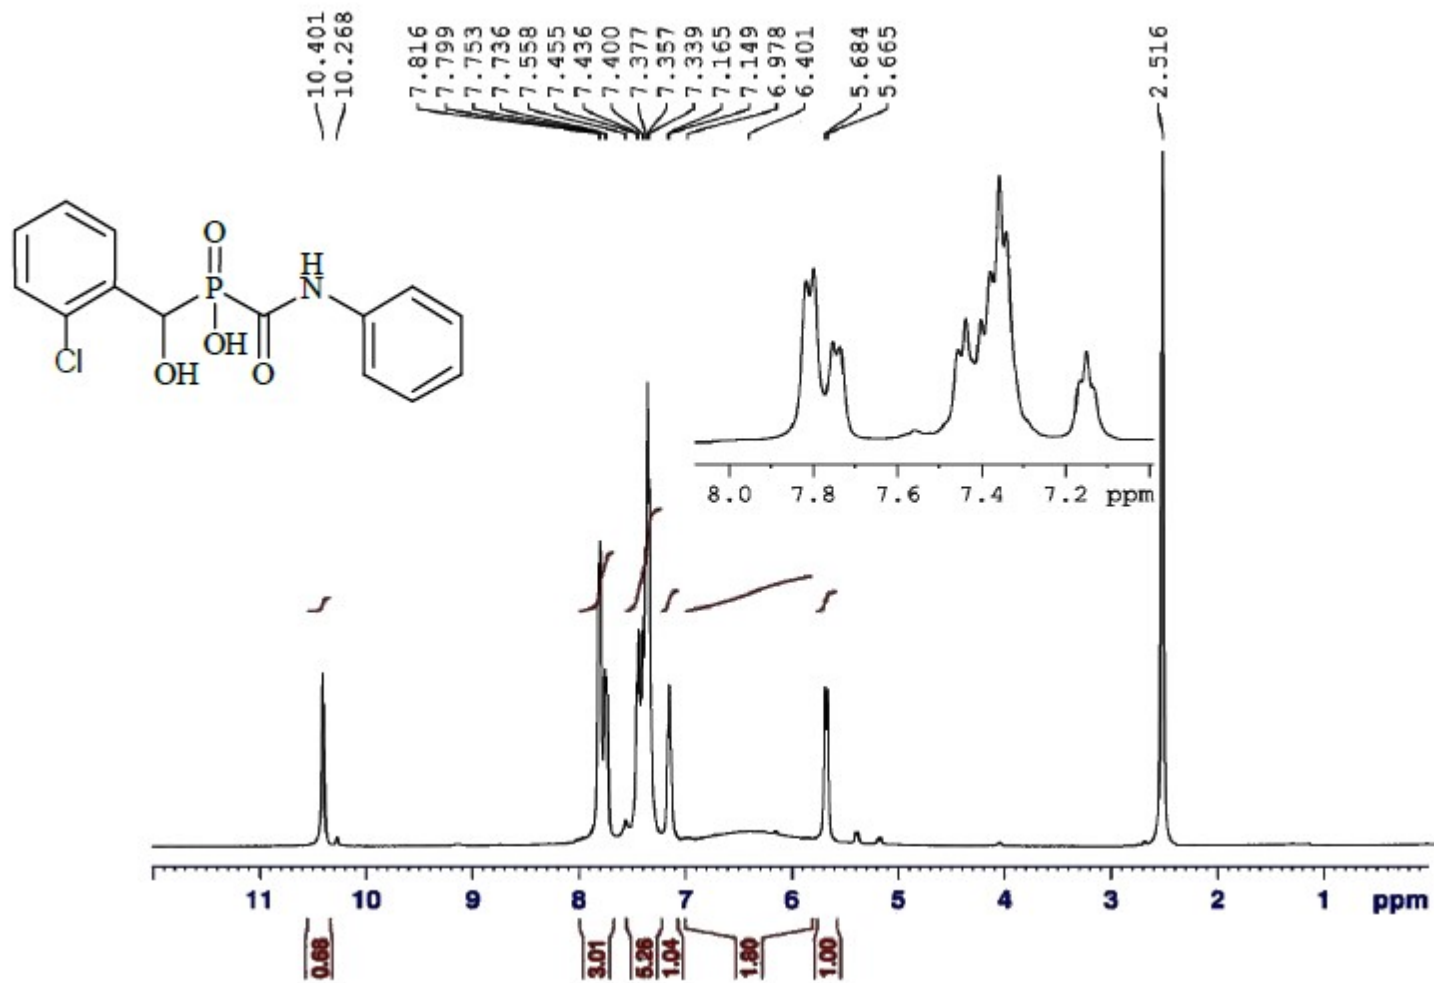

Figure S7: <sup>1</sup>H NMR Spectra of 3c

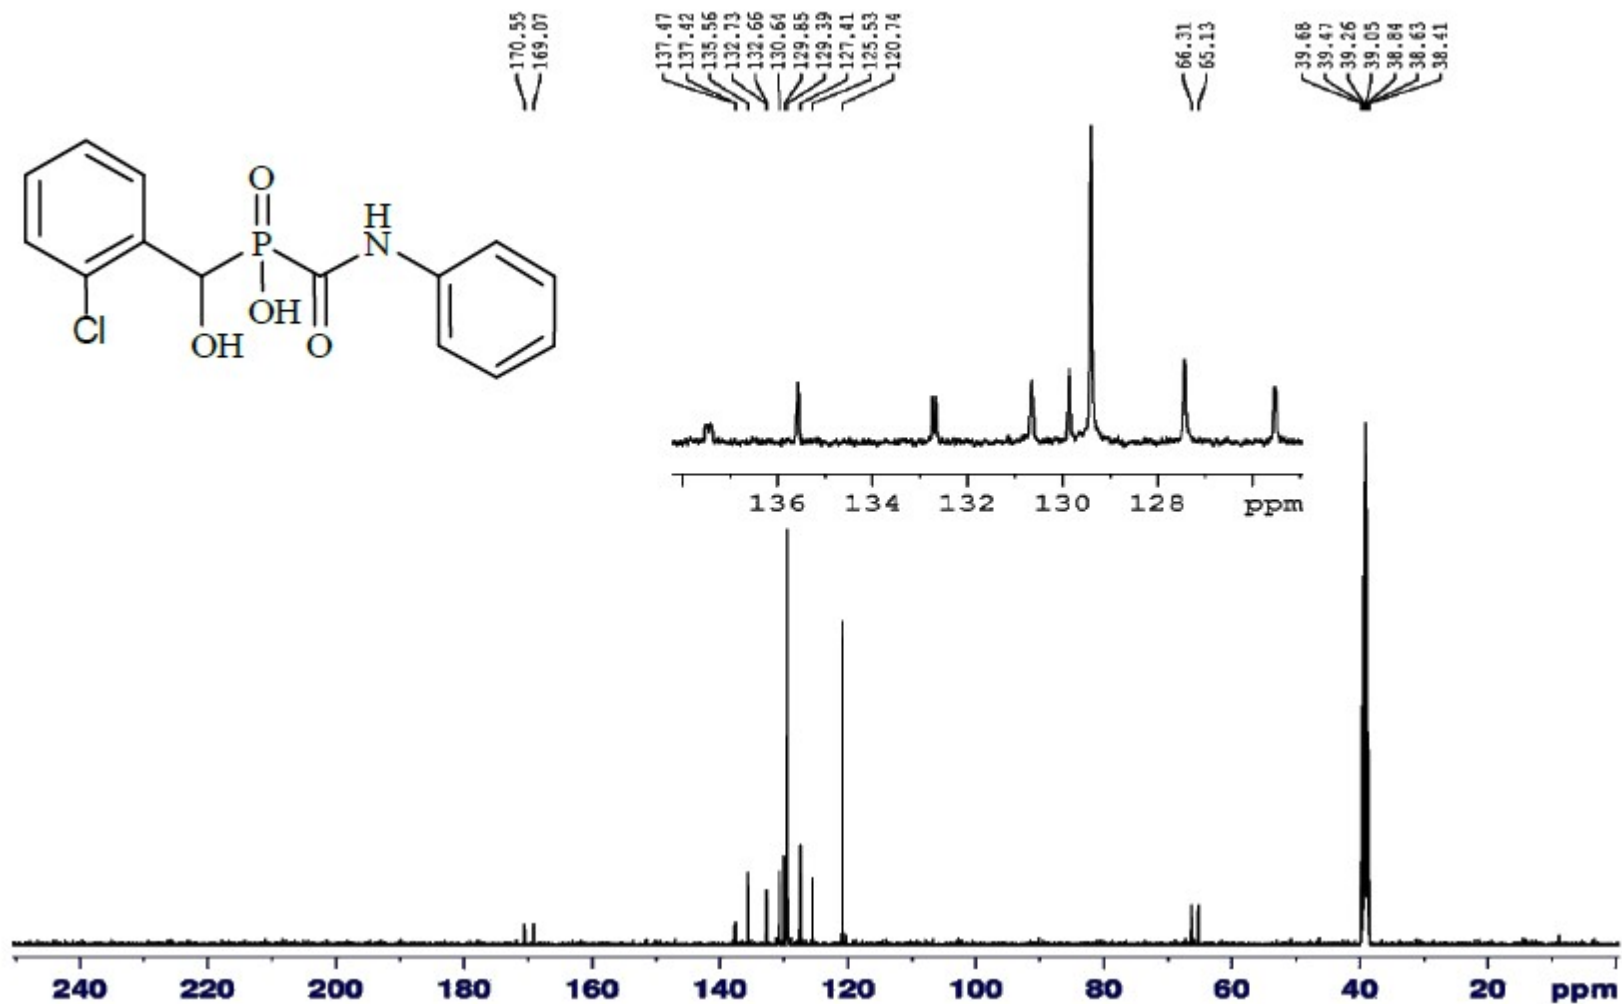

Figure S8: <sup>13</sup>C NMR Spectra of 3c

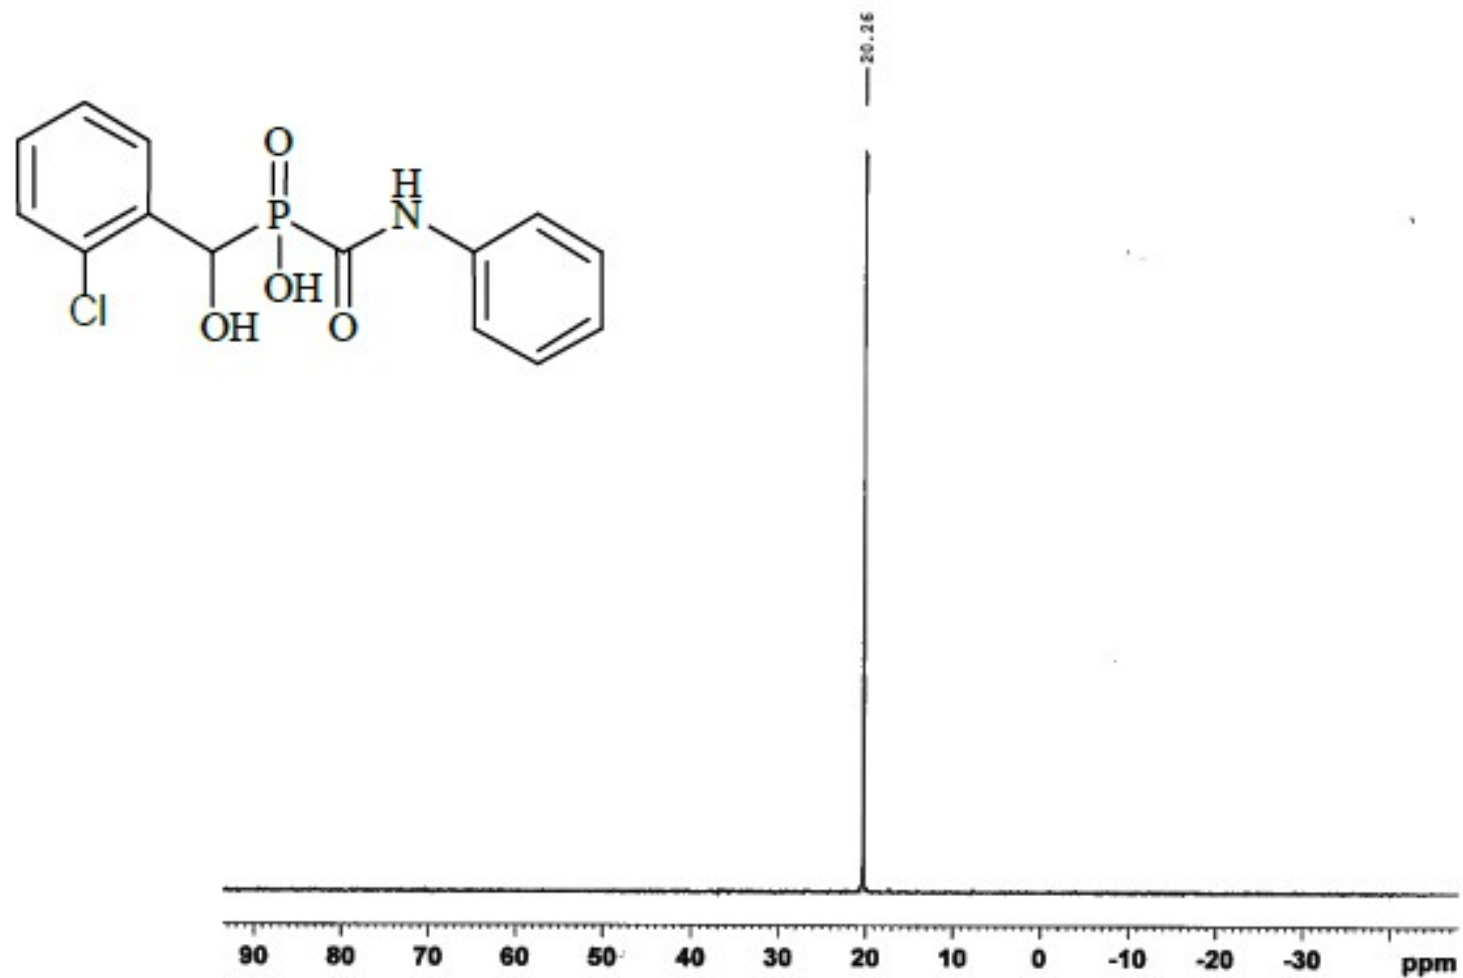

Figure S9:  $^{31}\text{P}$  NMR Spectra of 3c

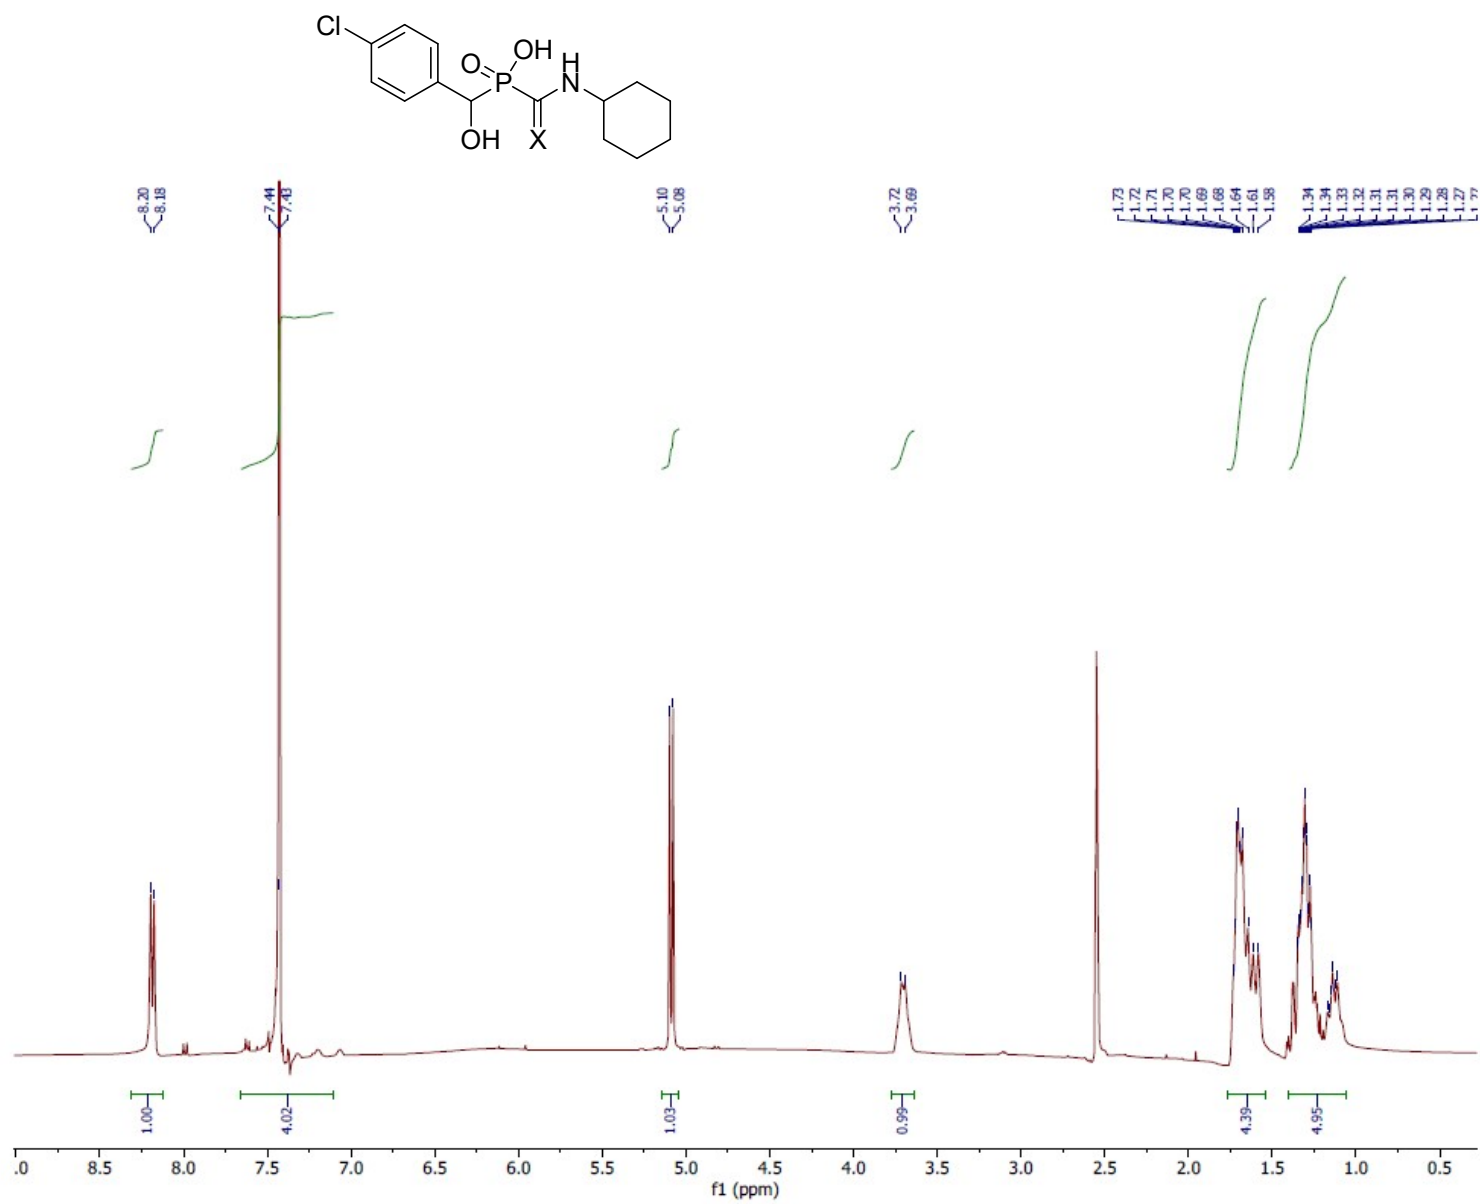

Figure S10: <sup>1</sup>H NMR Spectra of 3d

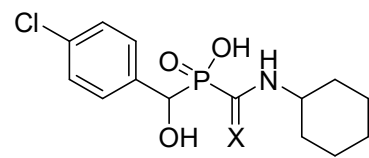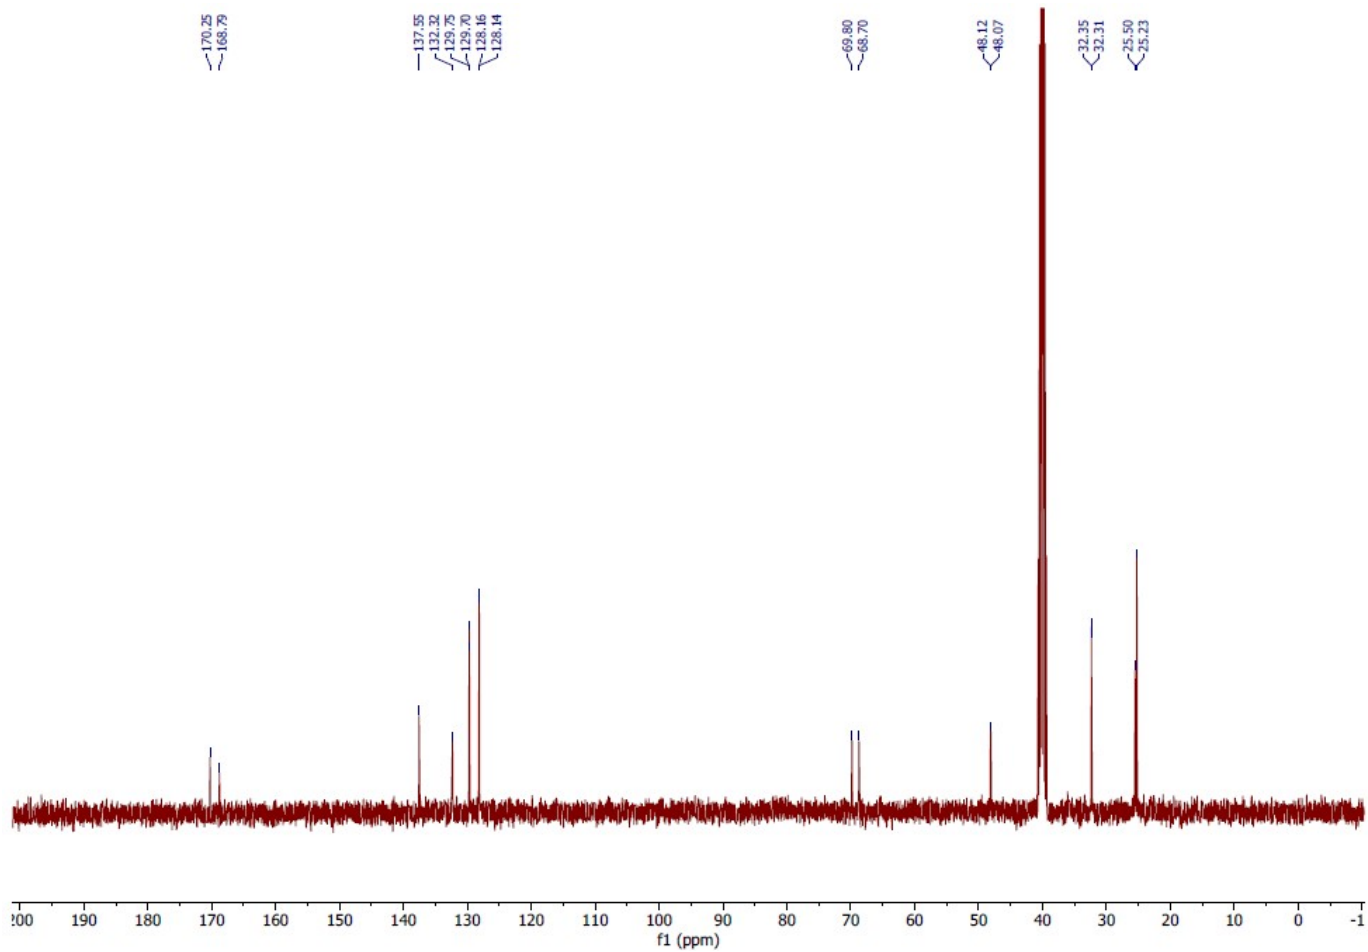

Figure S11: <sup>13</sup>C NMR Spectra of 3d

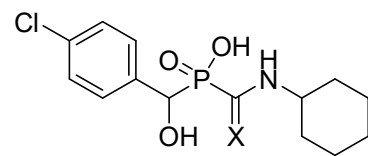

—19.52

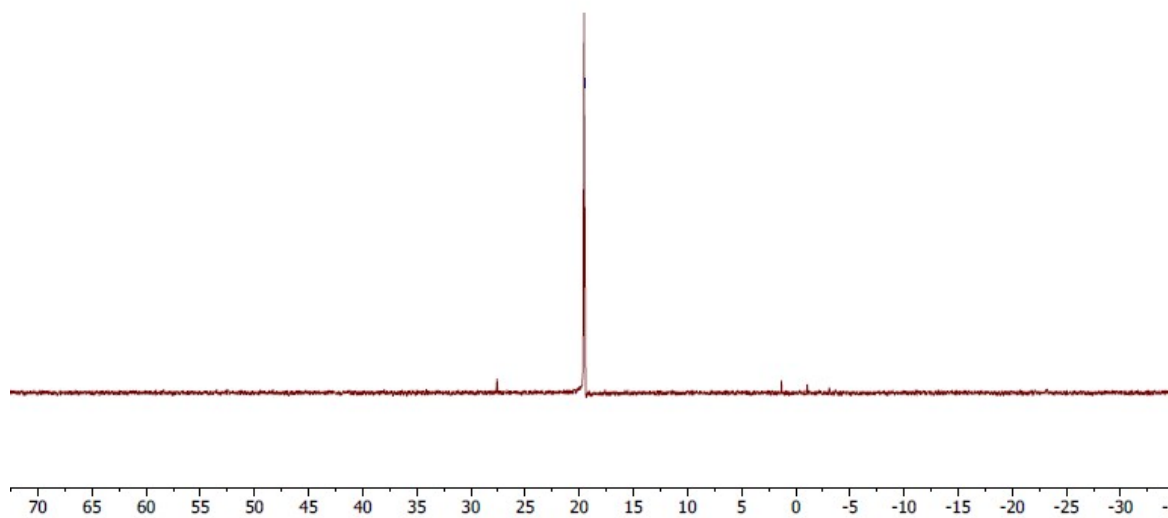

Figure S12:  $^{31}\text{P}$  NMR Spectra of 3d



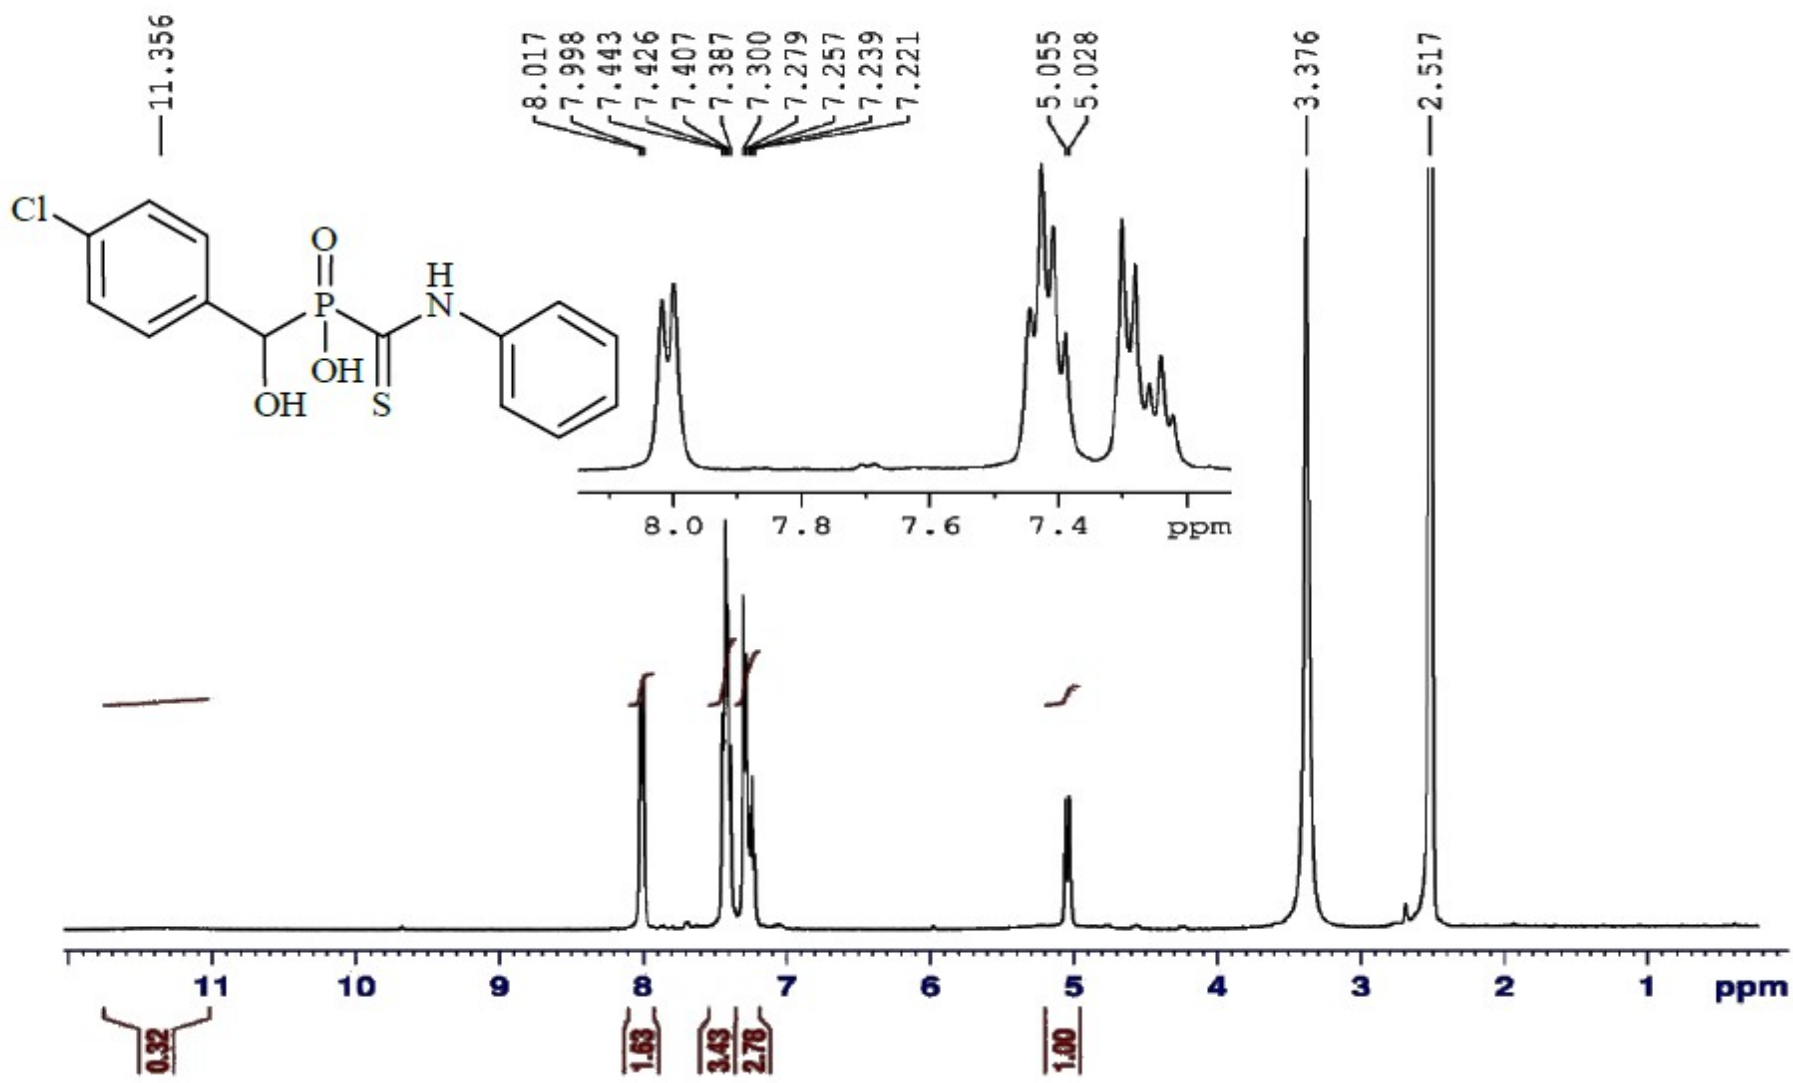

Figure S13:  $^1\text{H}$  NMR Spectra of 3e

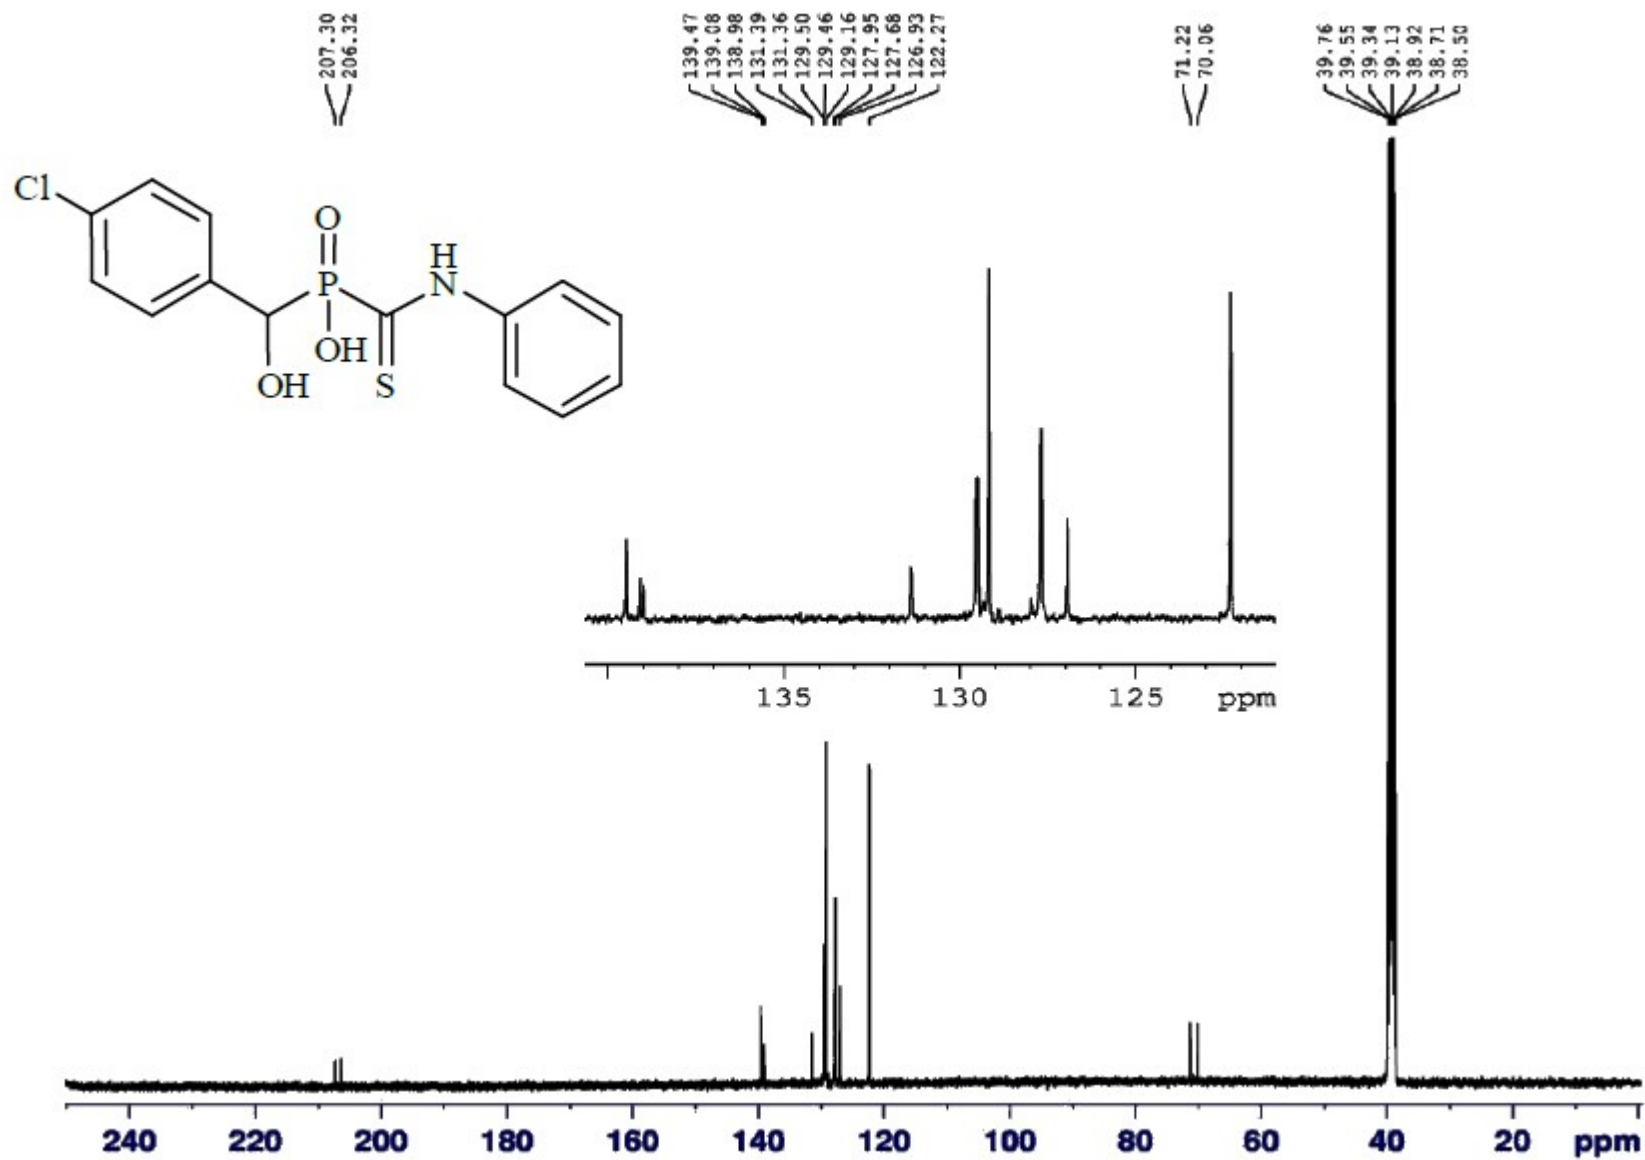

Figure S14:  $^{13}\text{C}$  NMR Spectra of 3e

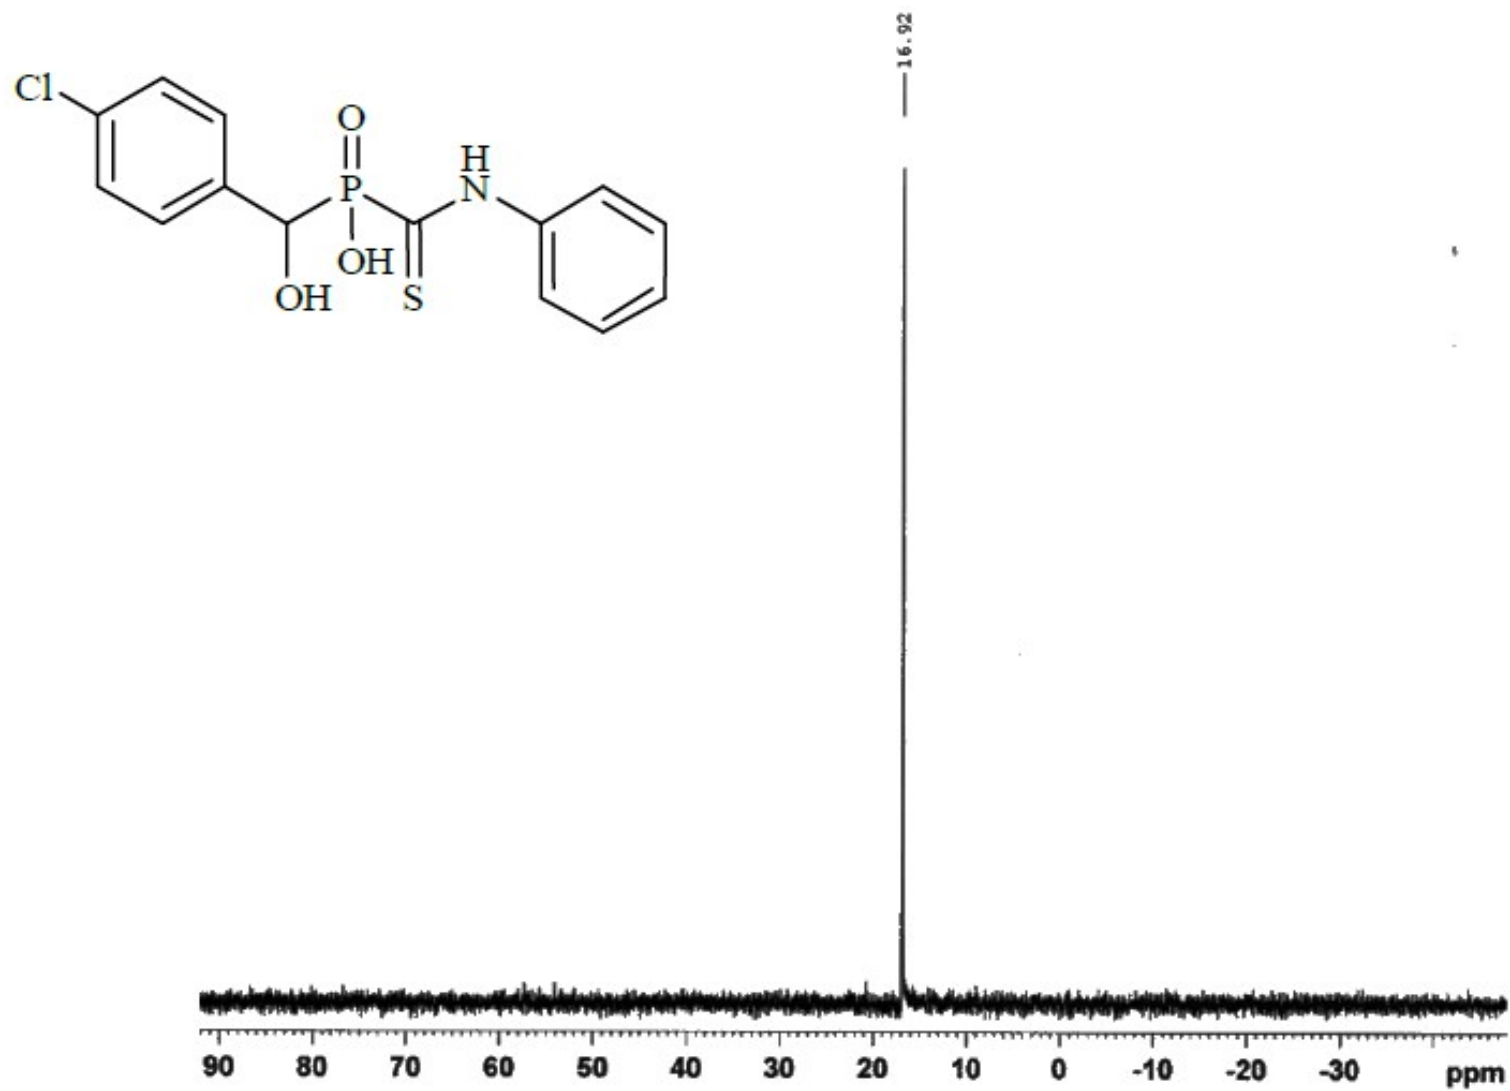

Figure S15:  $^{31}\text{P}$  NMR Spectra of 3e

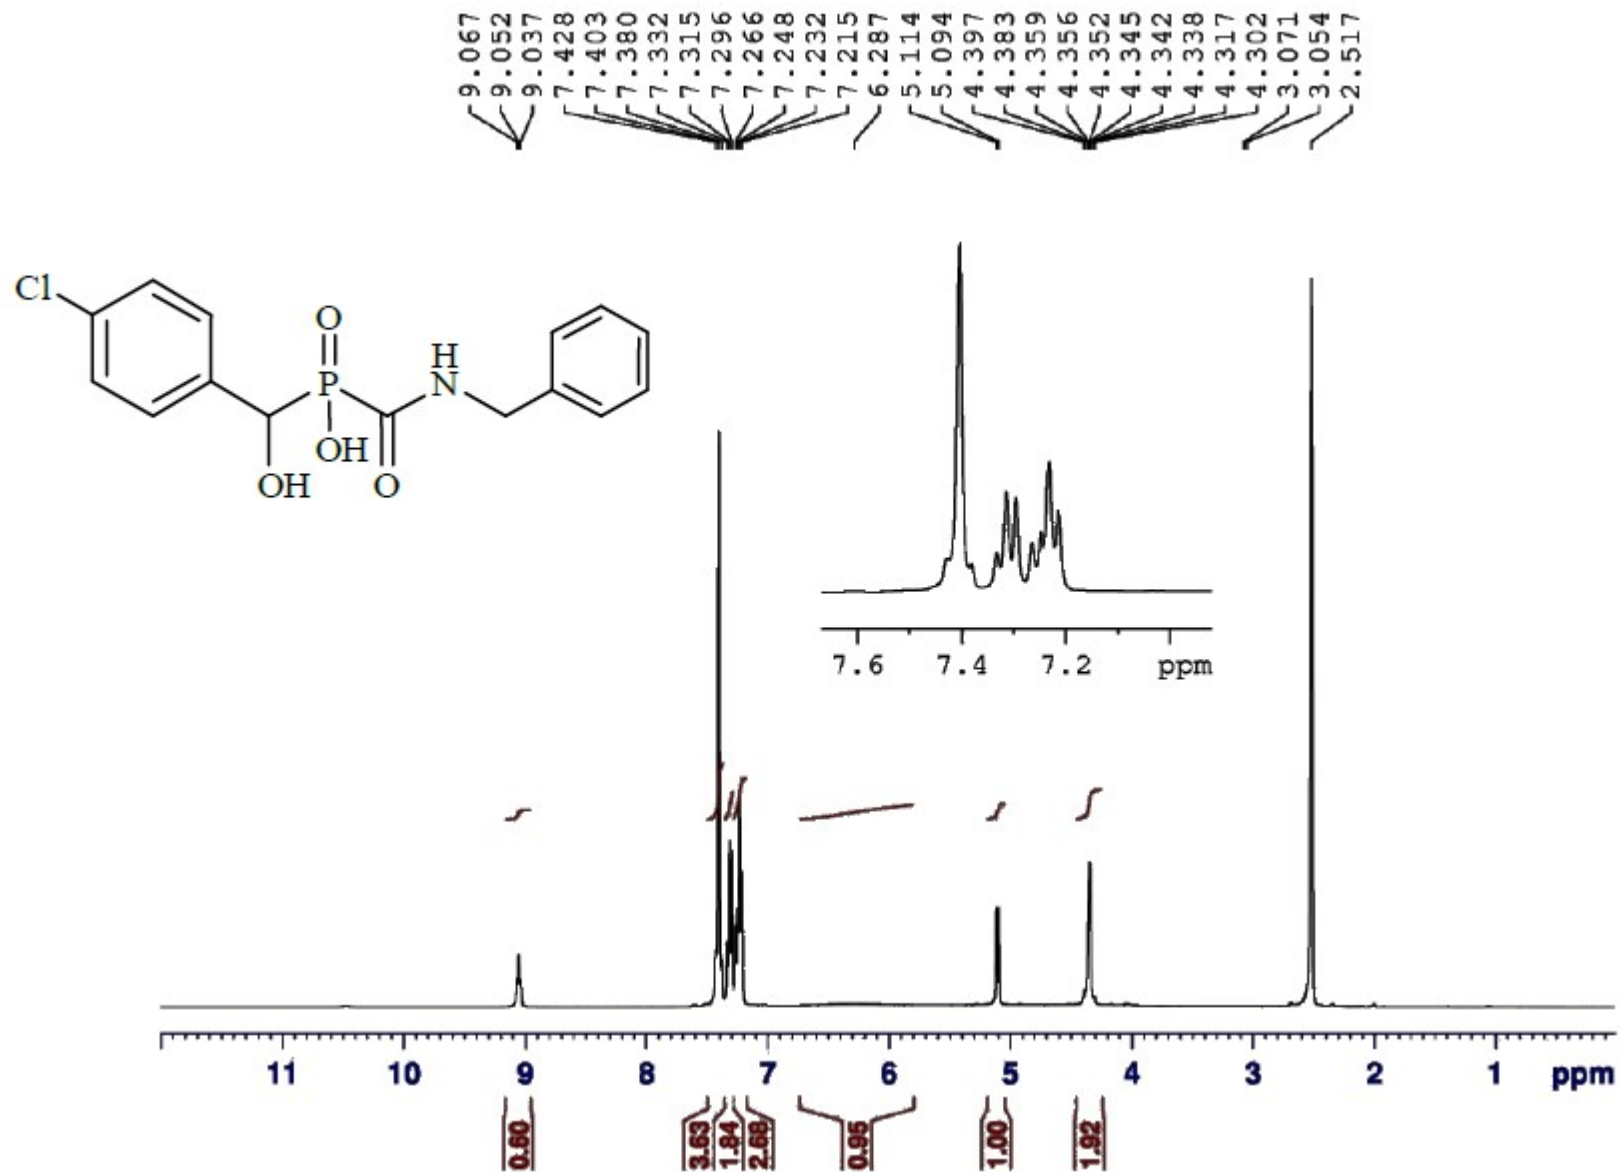

Figure S16: <sup>1</sup>H NMR Spectra of 3f

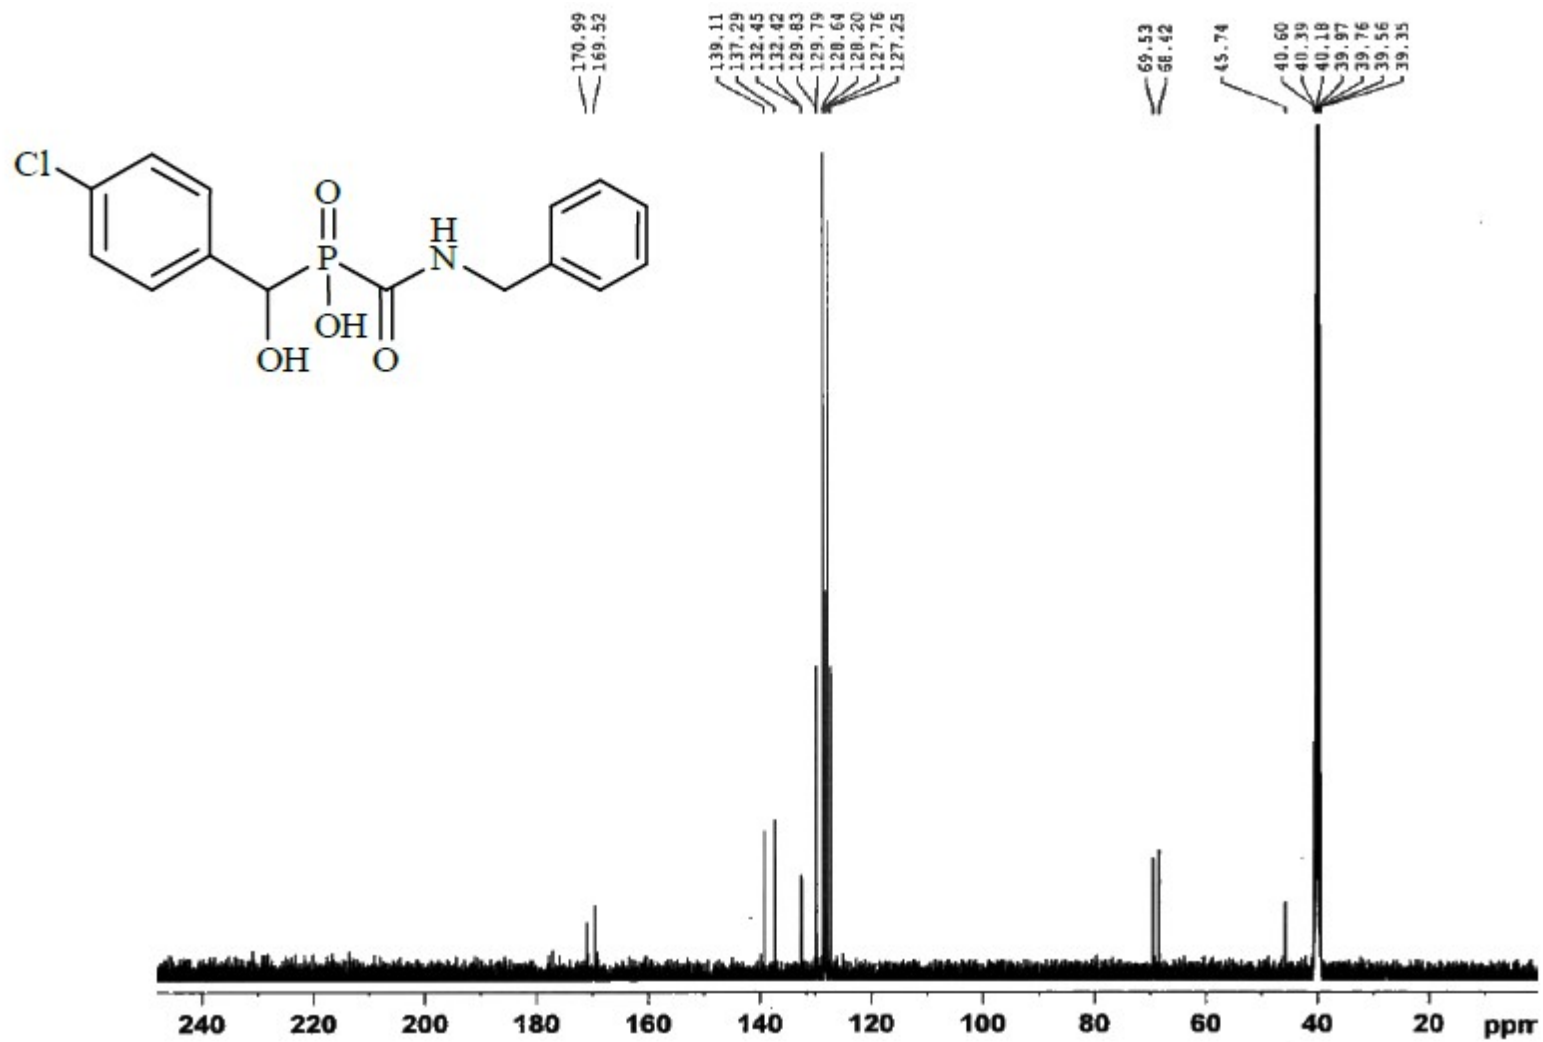

Figure S17: <sup>13</sup>C NMR Spectra of 3f

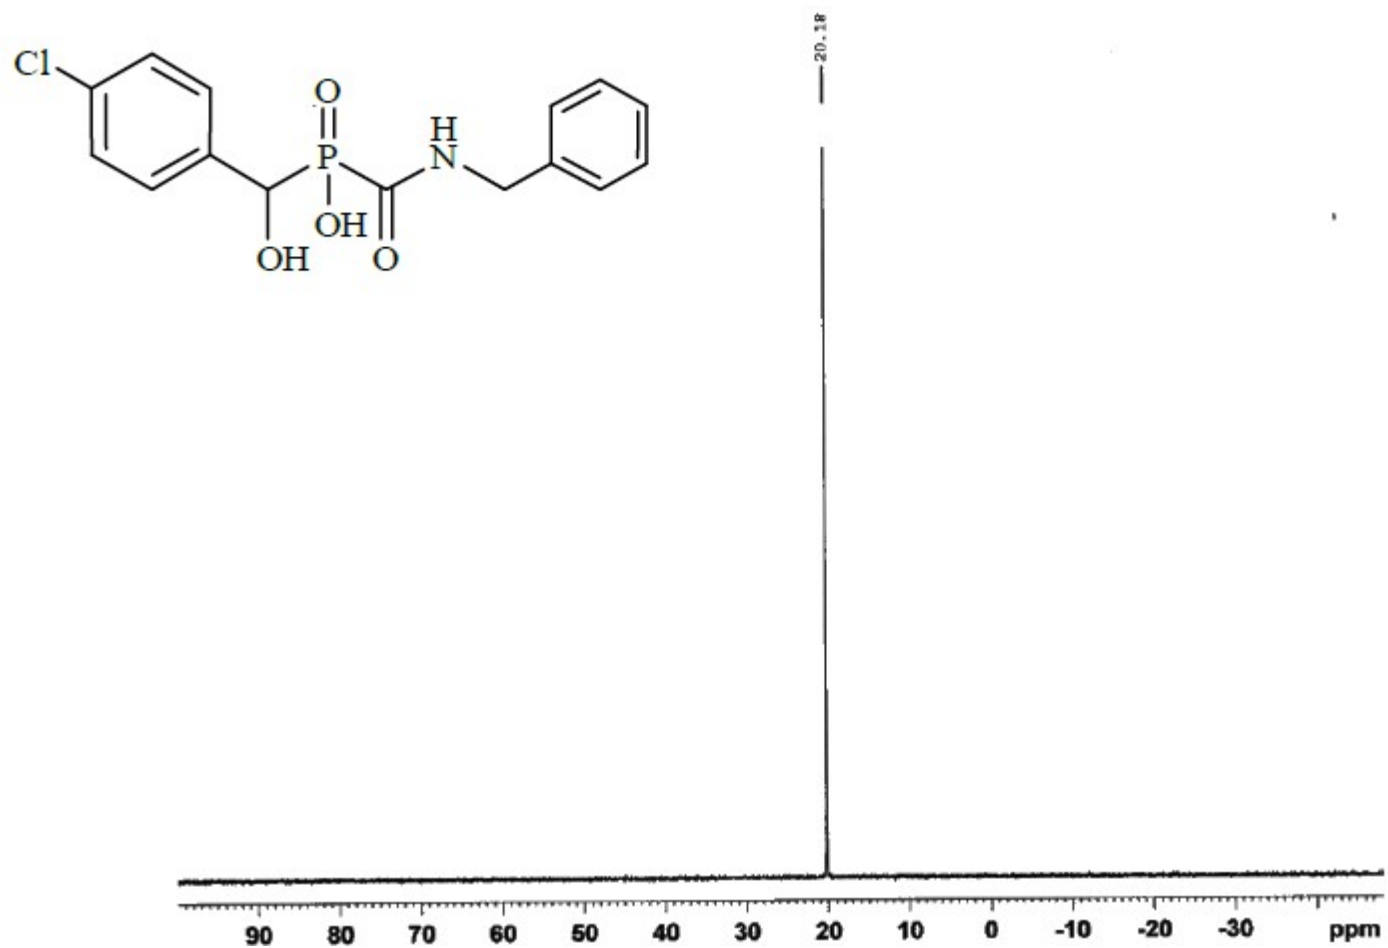

Figure S18:  $^{31}\text{P}$  NMR Spectra of 3f

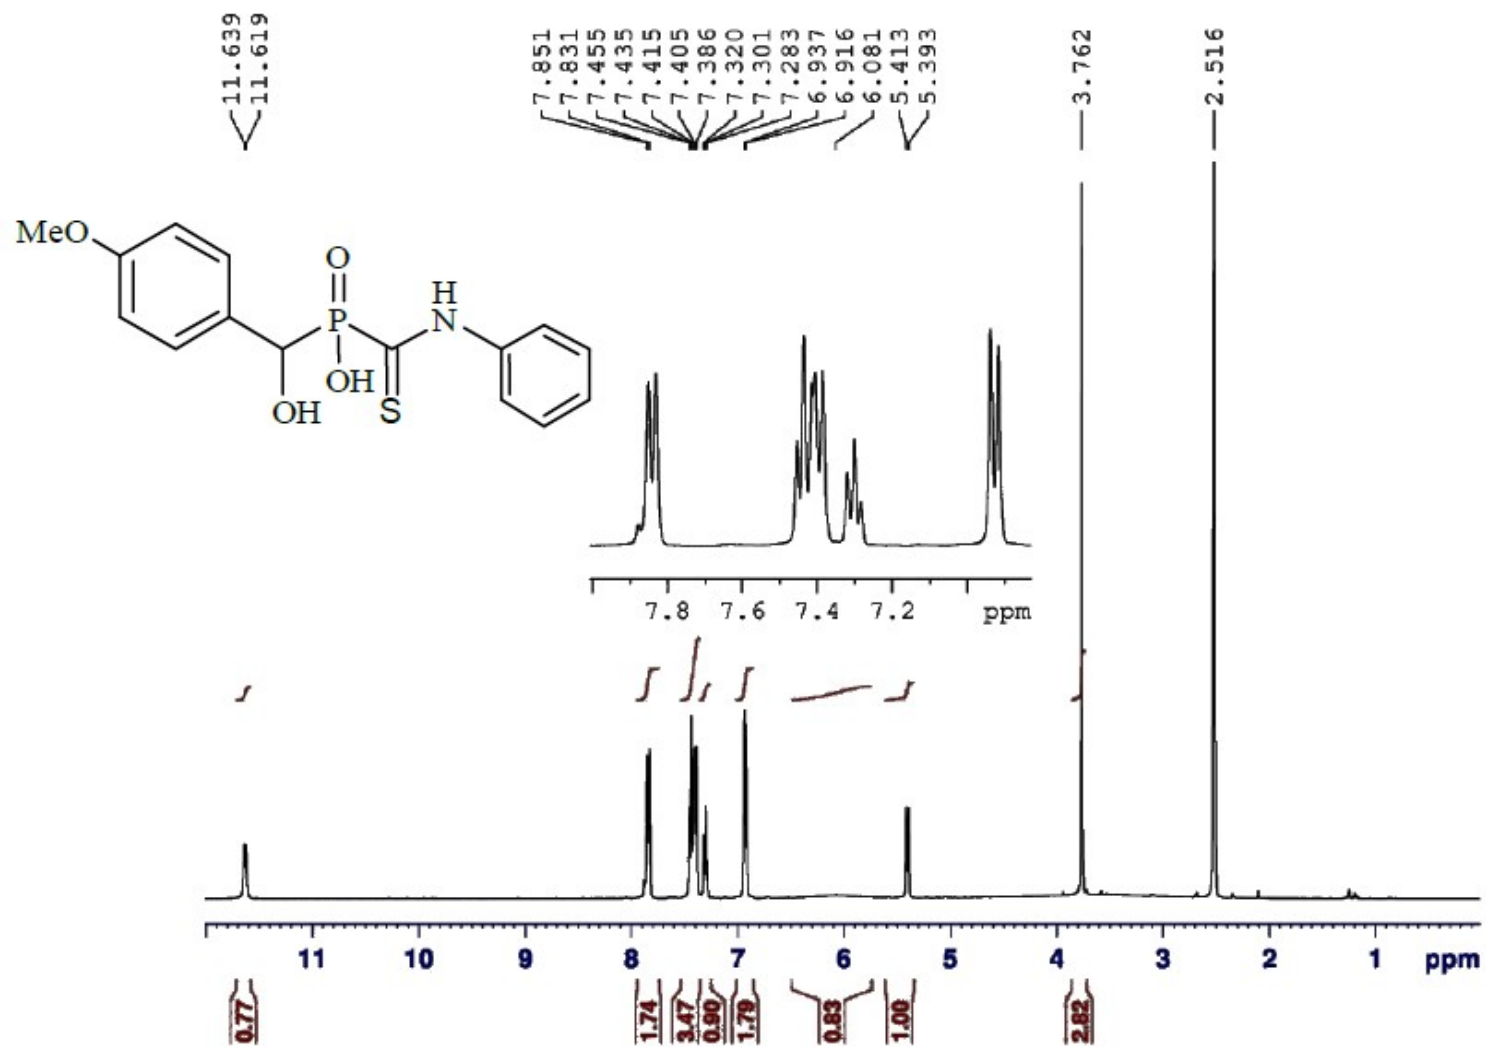

Figure S19: <sup>1</sup>H NMR Spectra of 3g

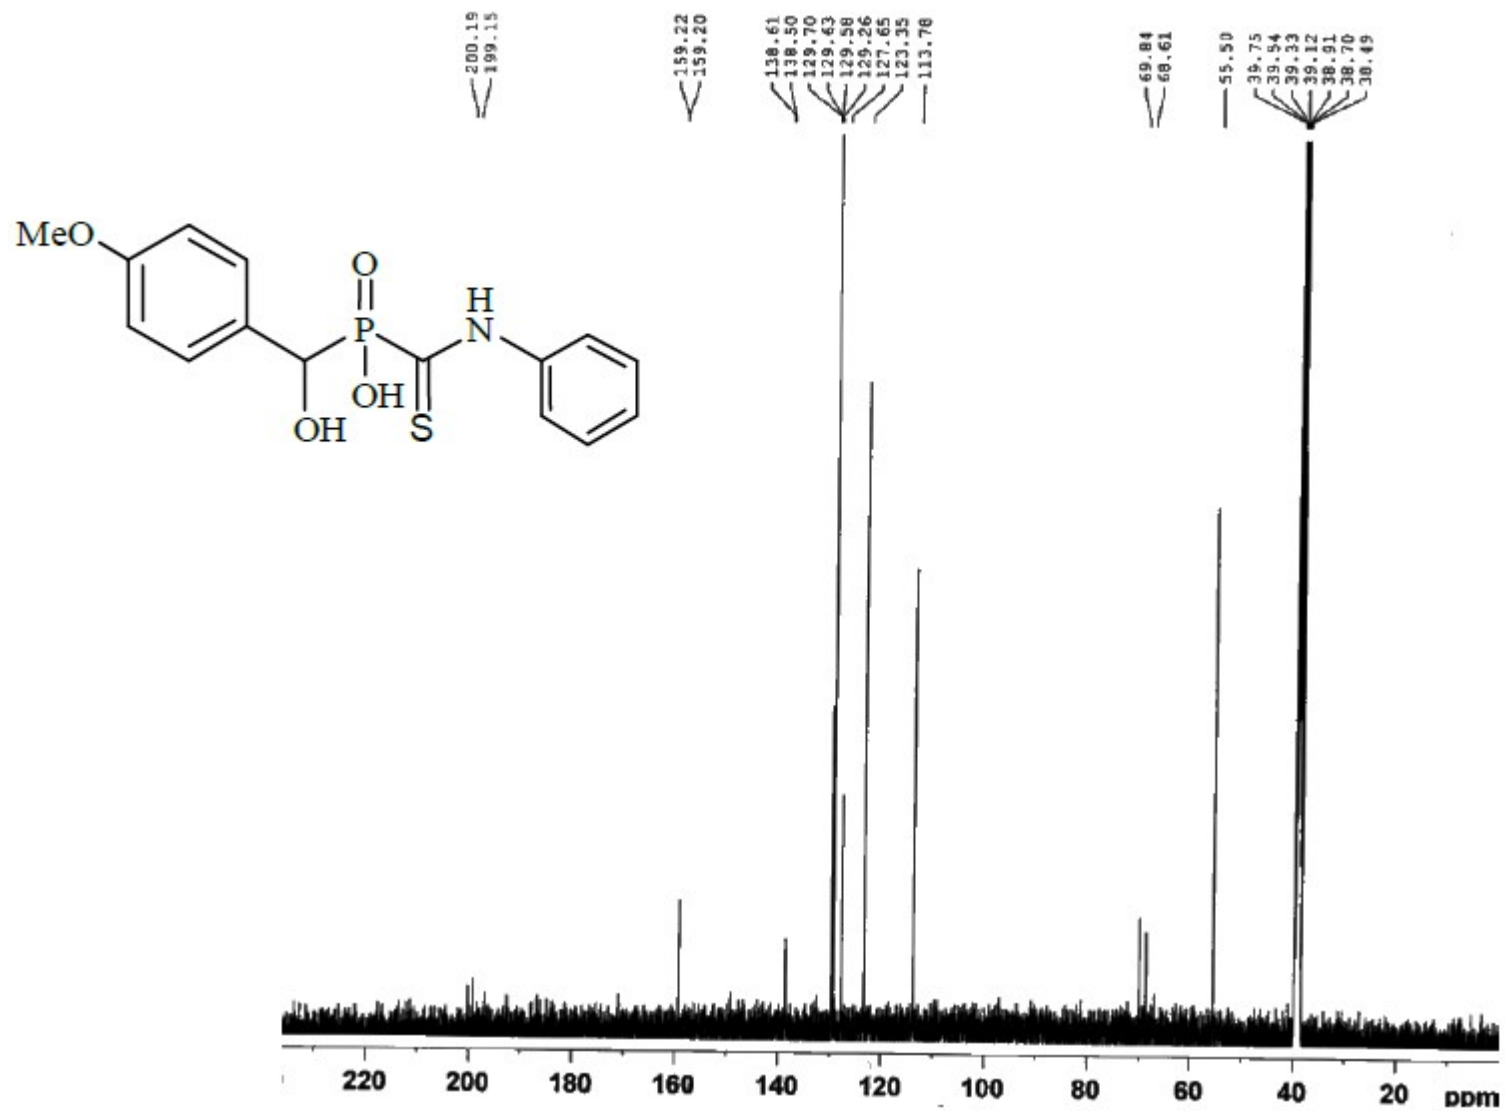

Figure S20: <sup>13</sup>C NMR Spectra of 3g



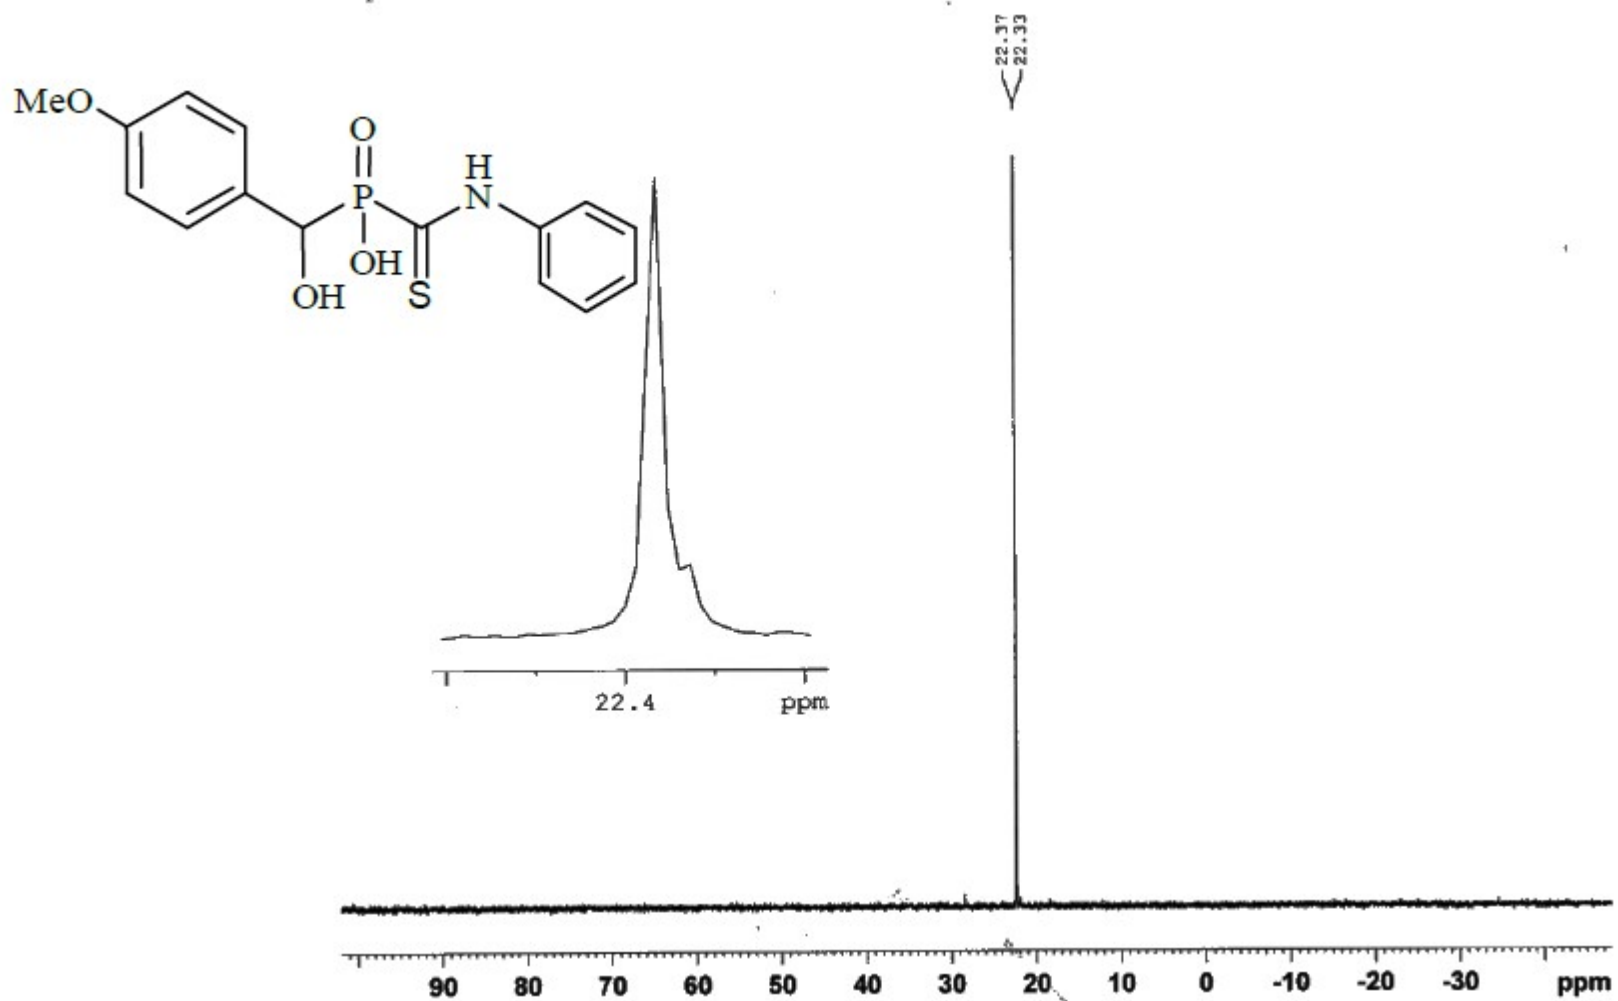

Figure S21:  $^{31}\text{P}$  NMR Spectra of 3g

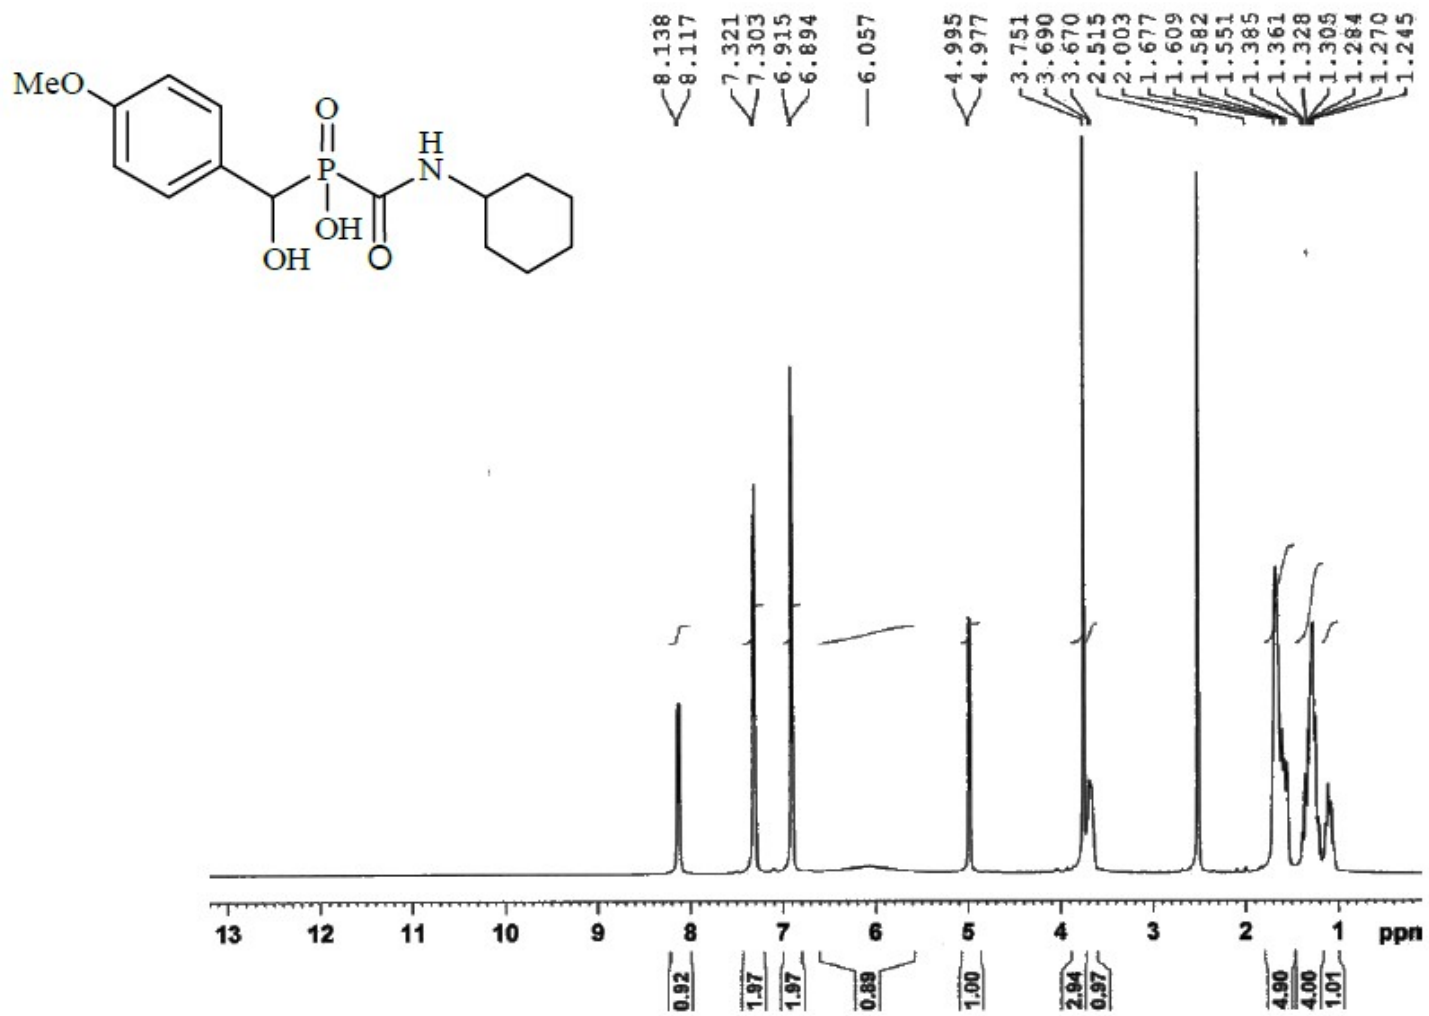

Figure S22: <sup>1</sup>H NMR Spectra of 3h

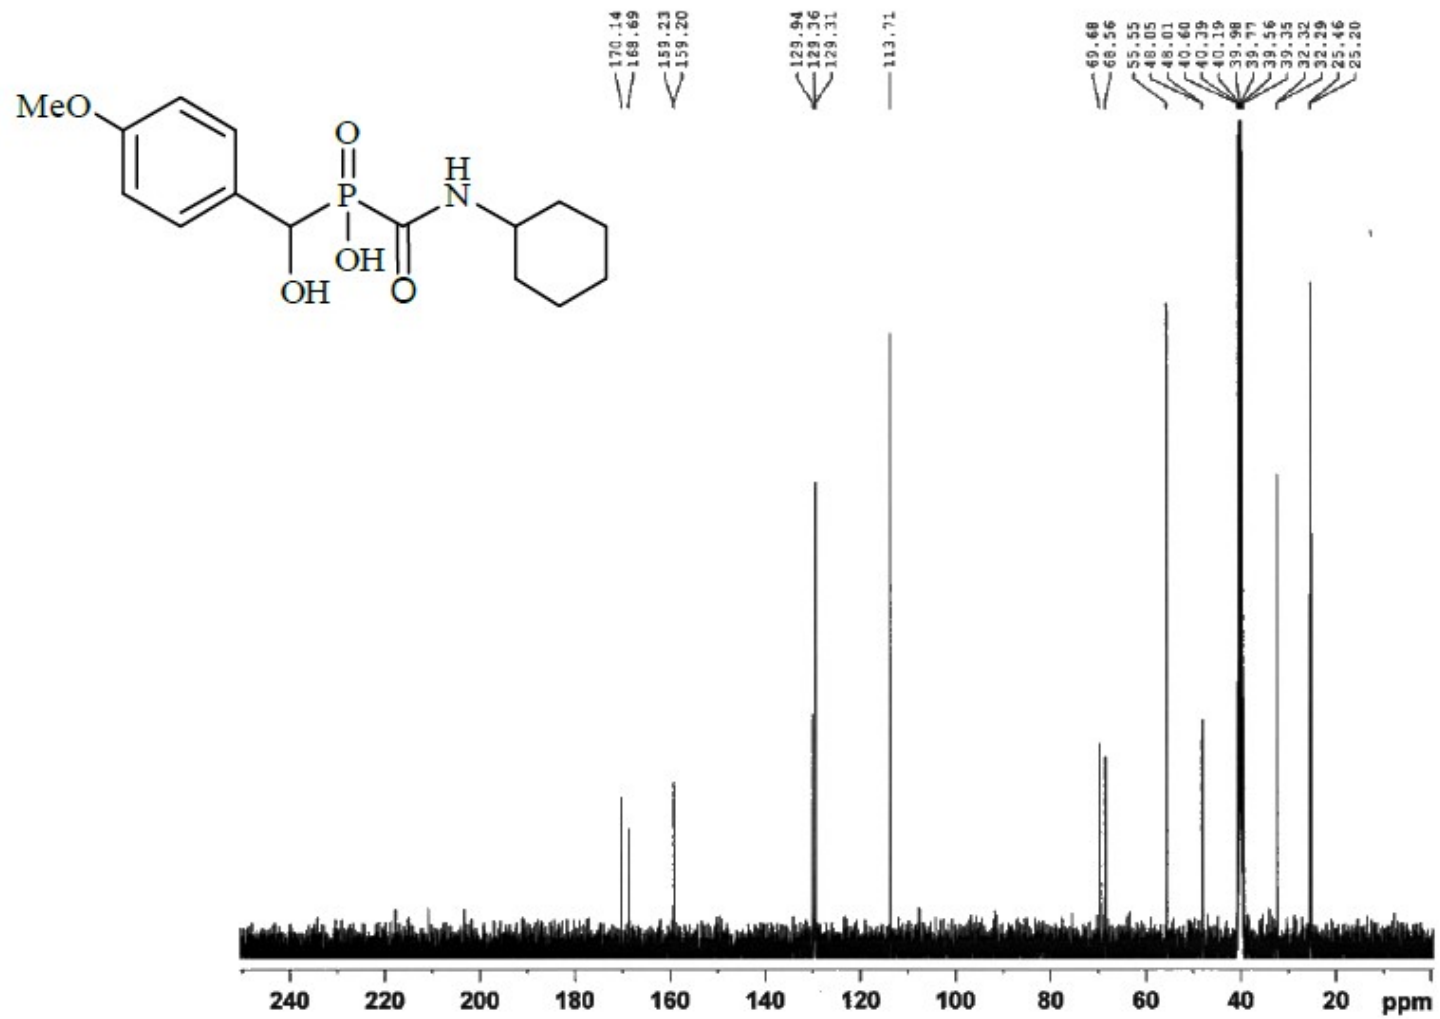

Figure S23: <sup>13</sup>C NMR Spectra of 3h

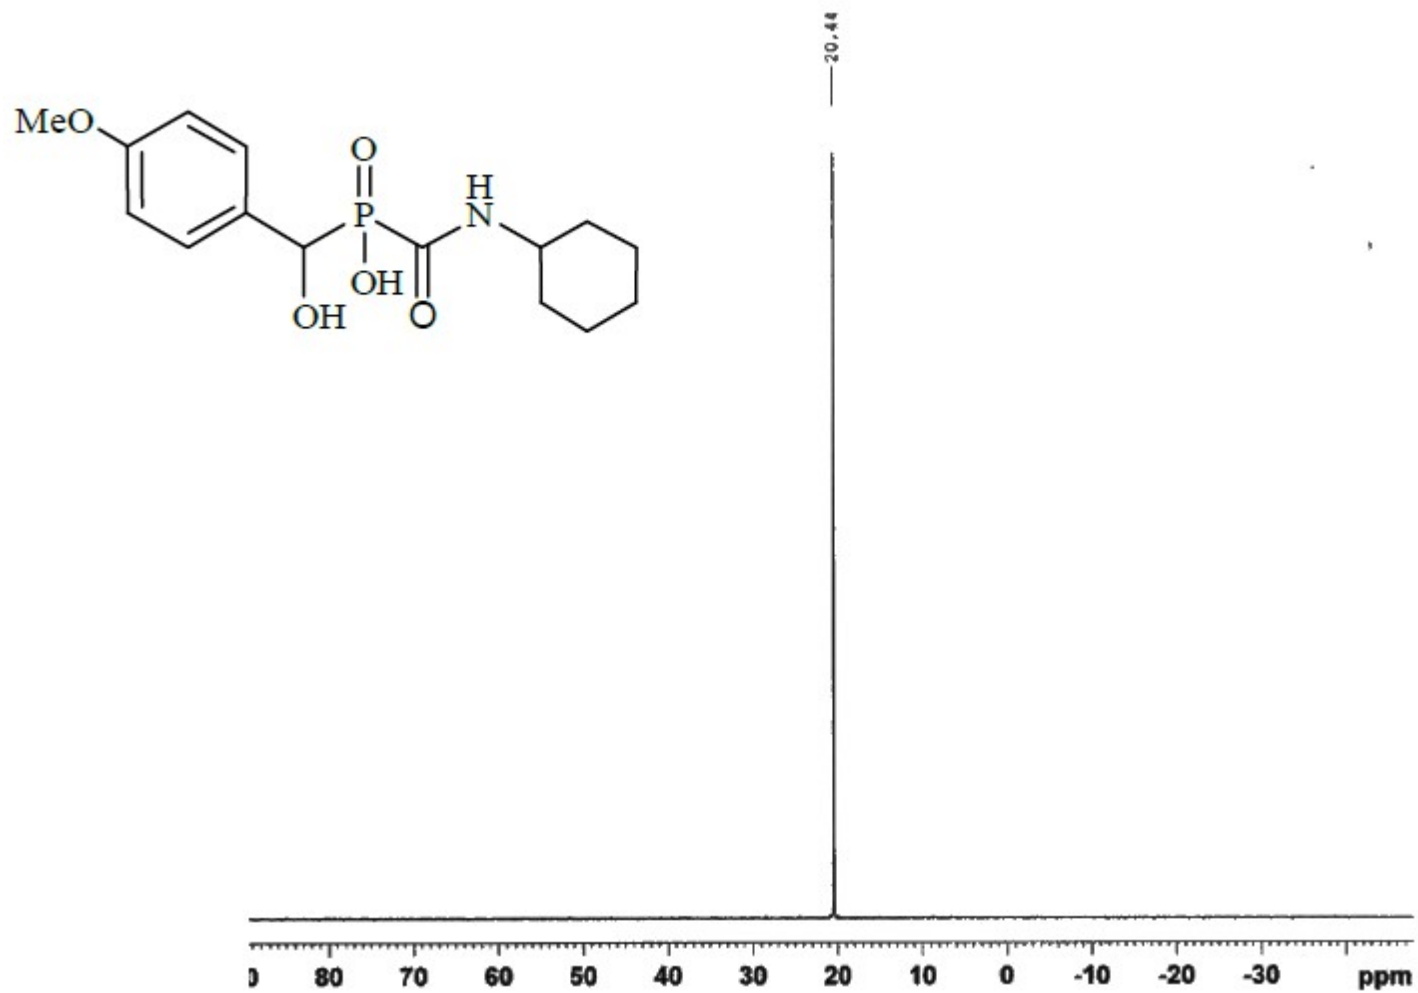

Figure S24:  $^{31}\text{P}$  NMR Spectra of 3h

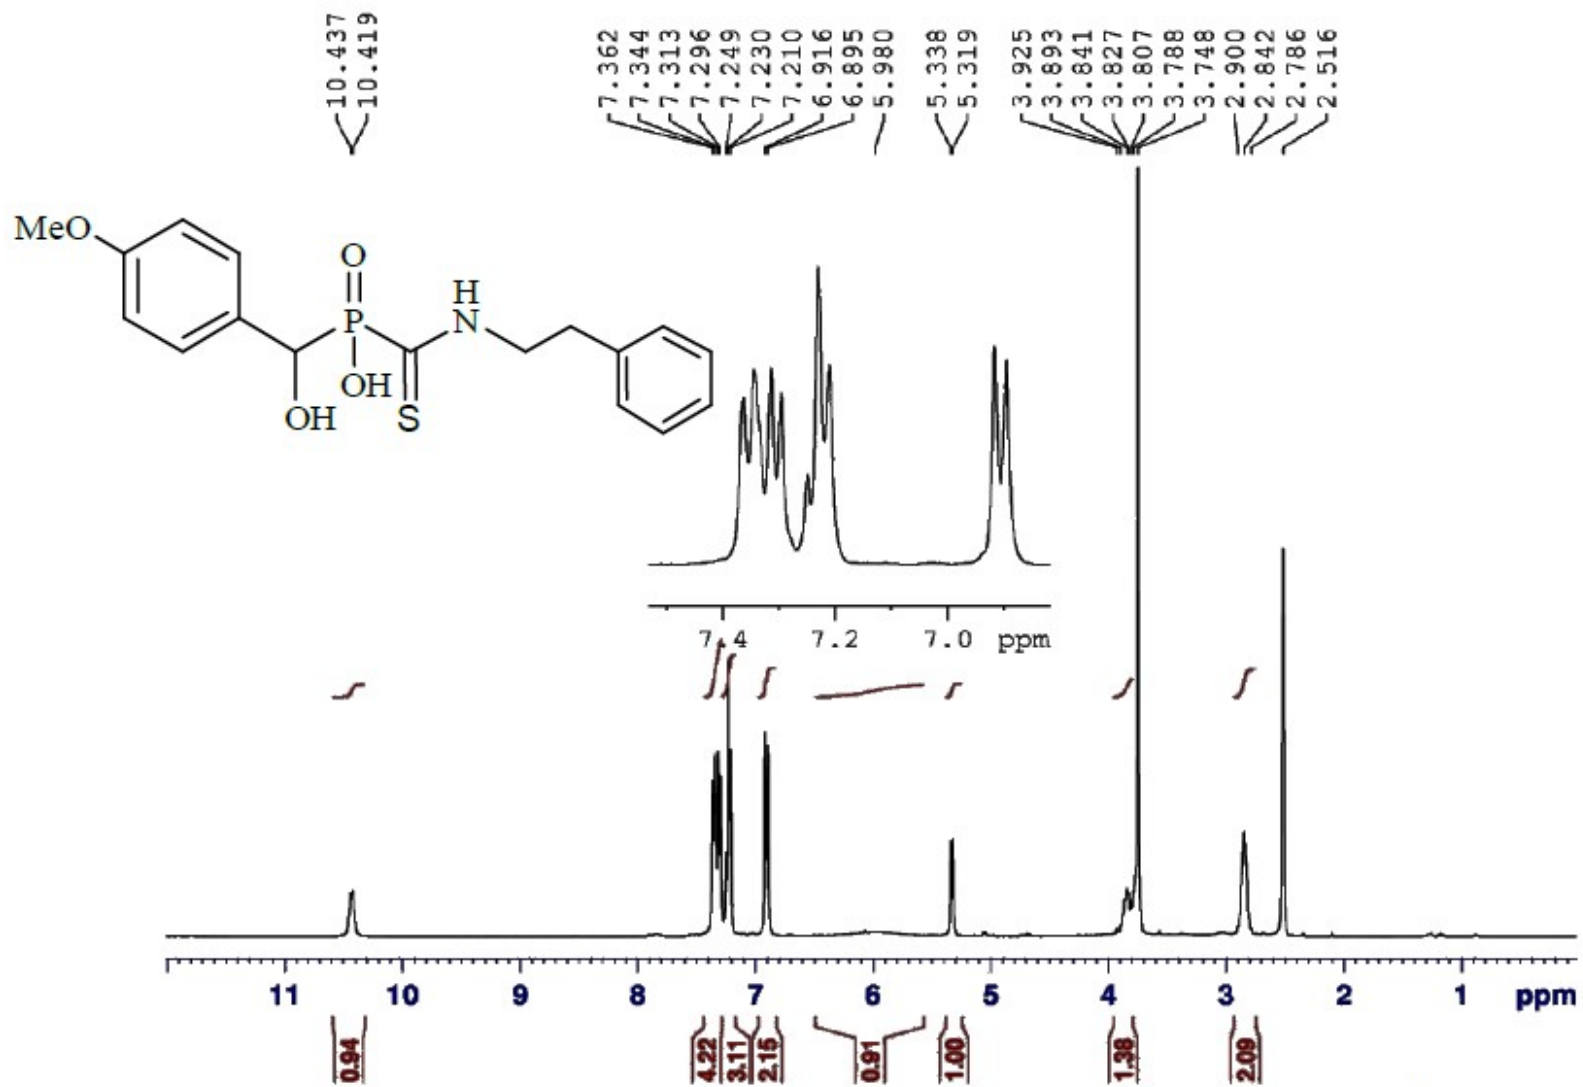

Figure S25: <sup>1</sup>H NMR Spectra of 3i

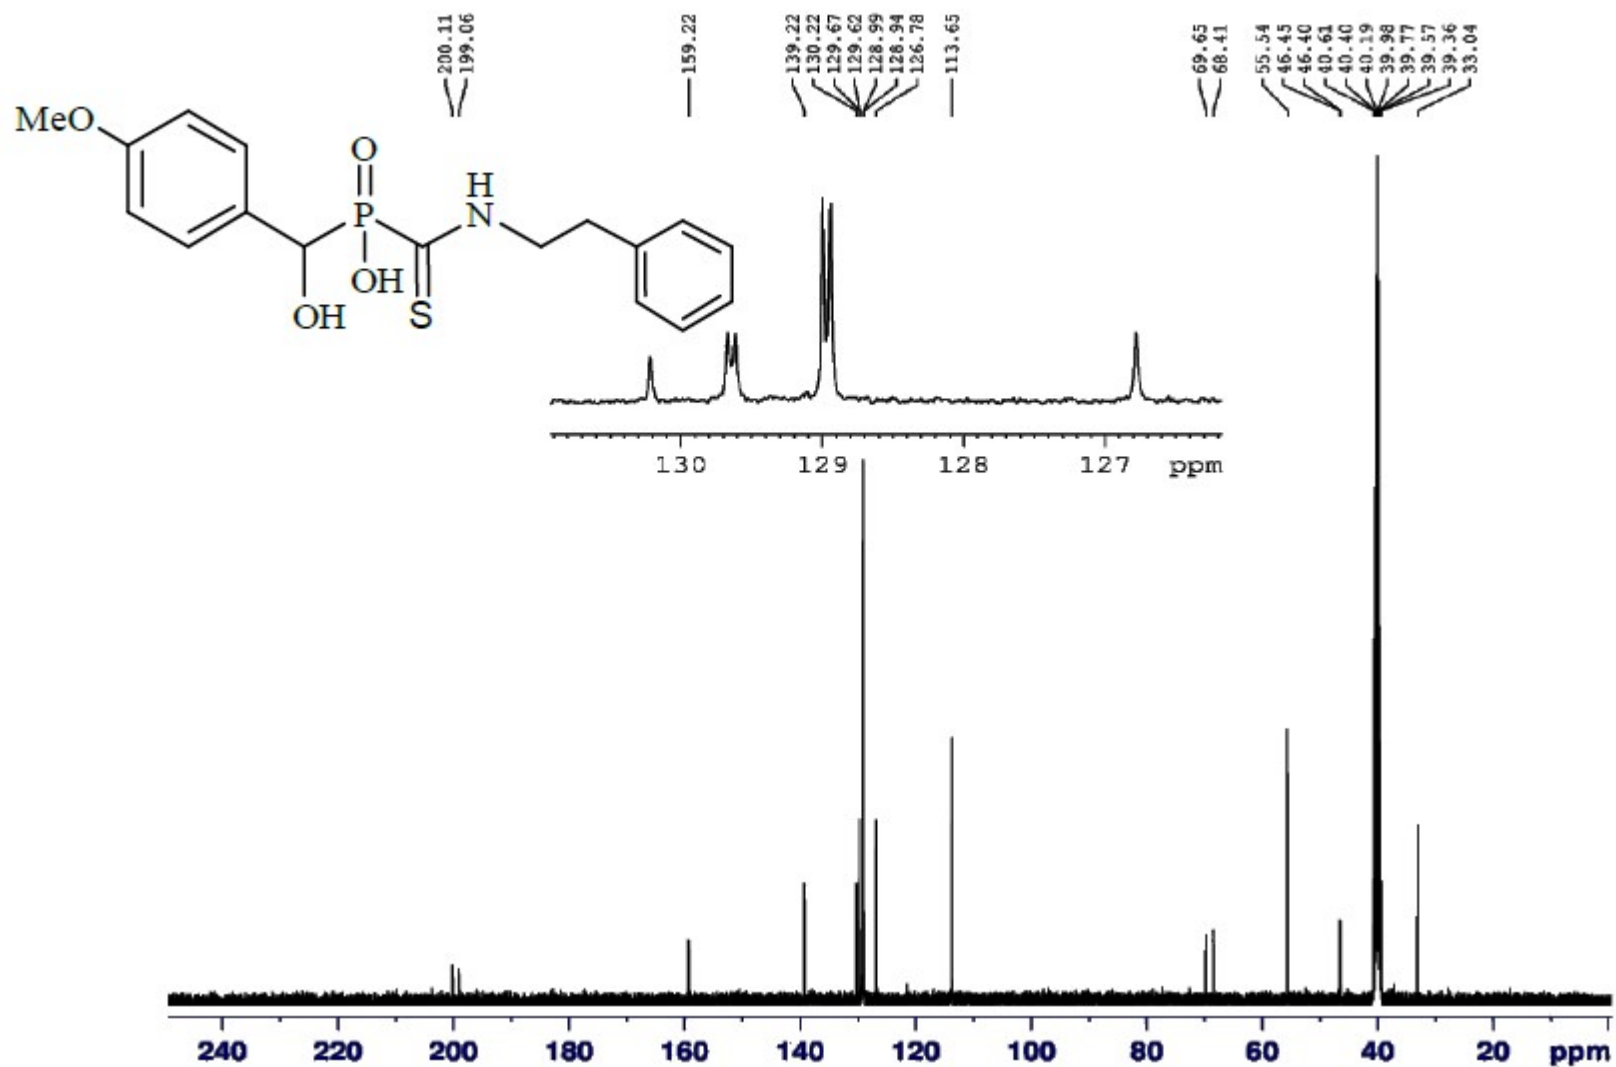

Figure S26:  $^{13}\text{C}$  NMR Spectra of 3i

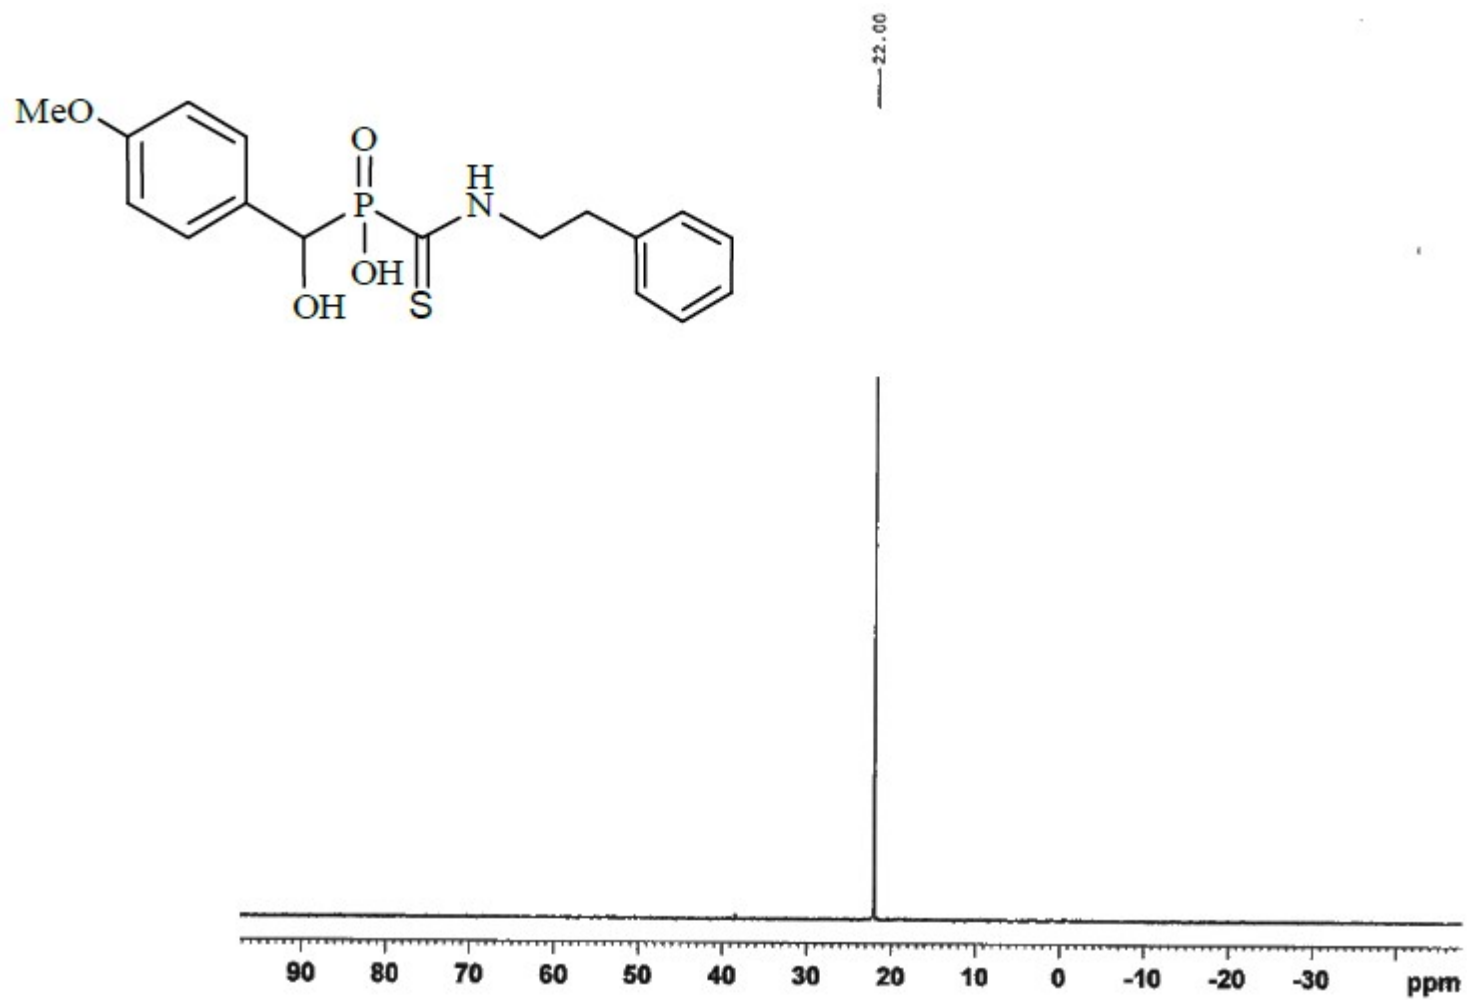

Figure S27:  $^{31}\text{P}$  NMR Spectra of 3i

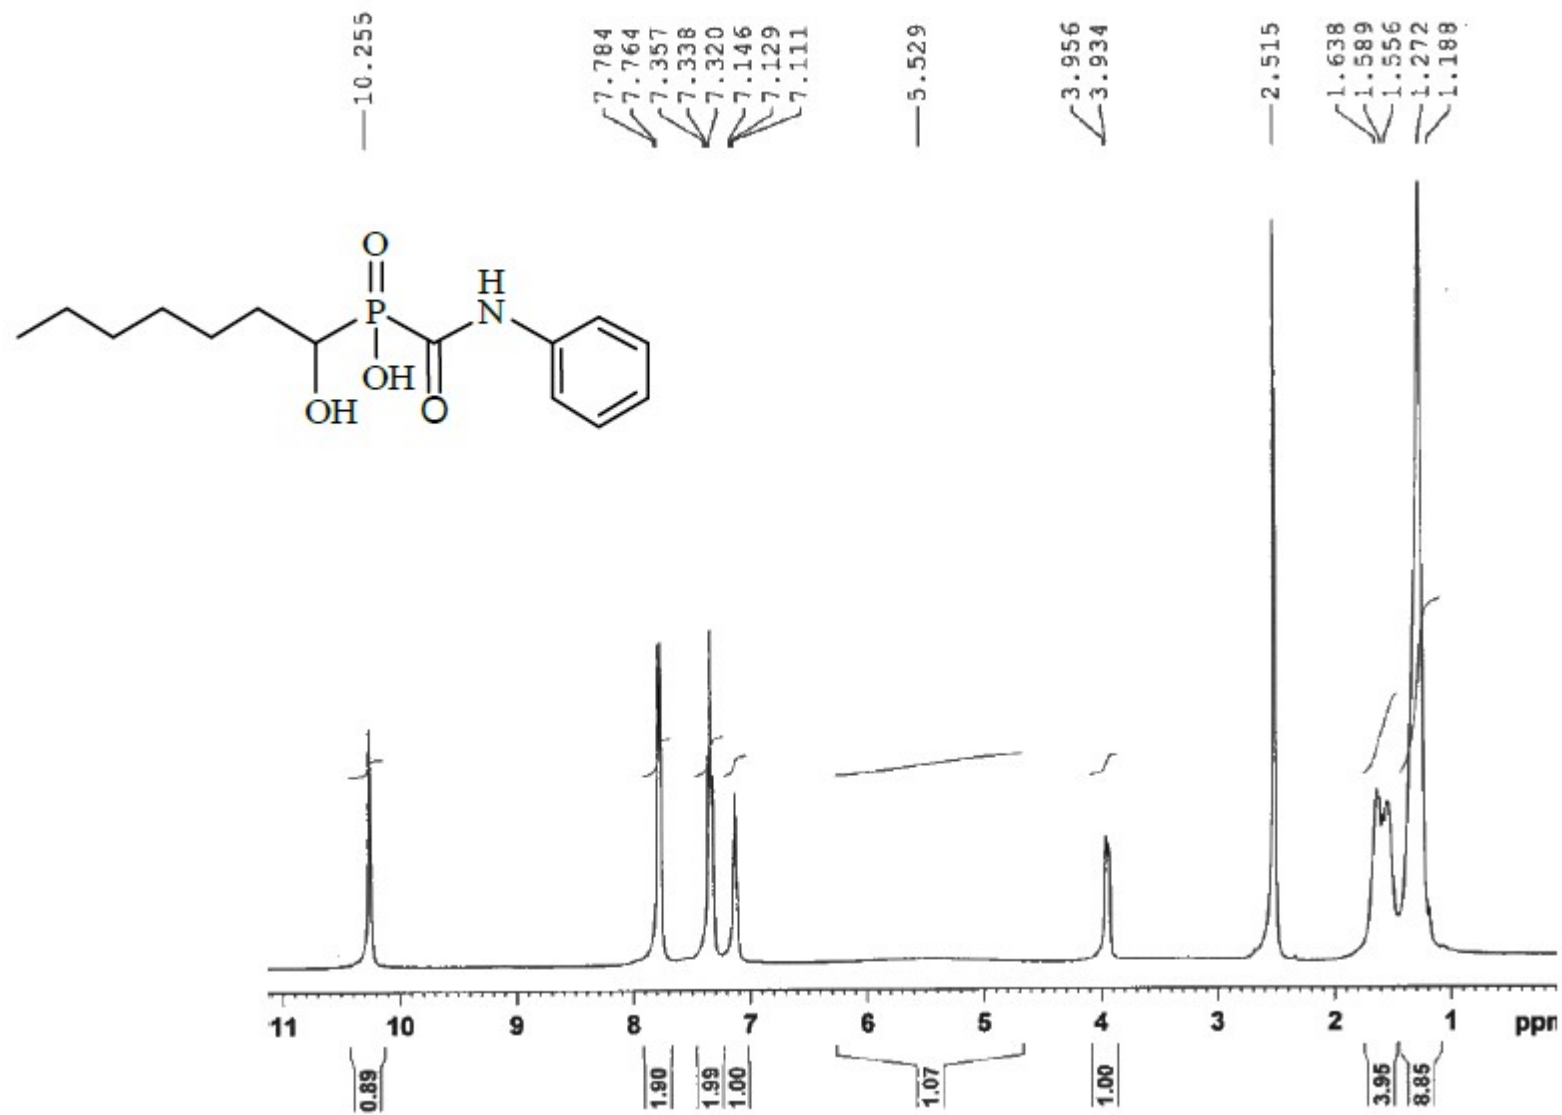

Figure S28: <sup>1</sup>H NMR Spectra of 3j



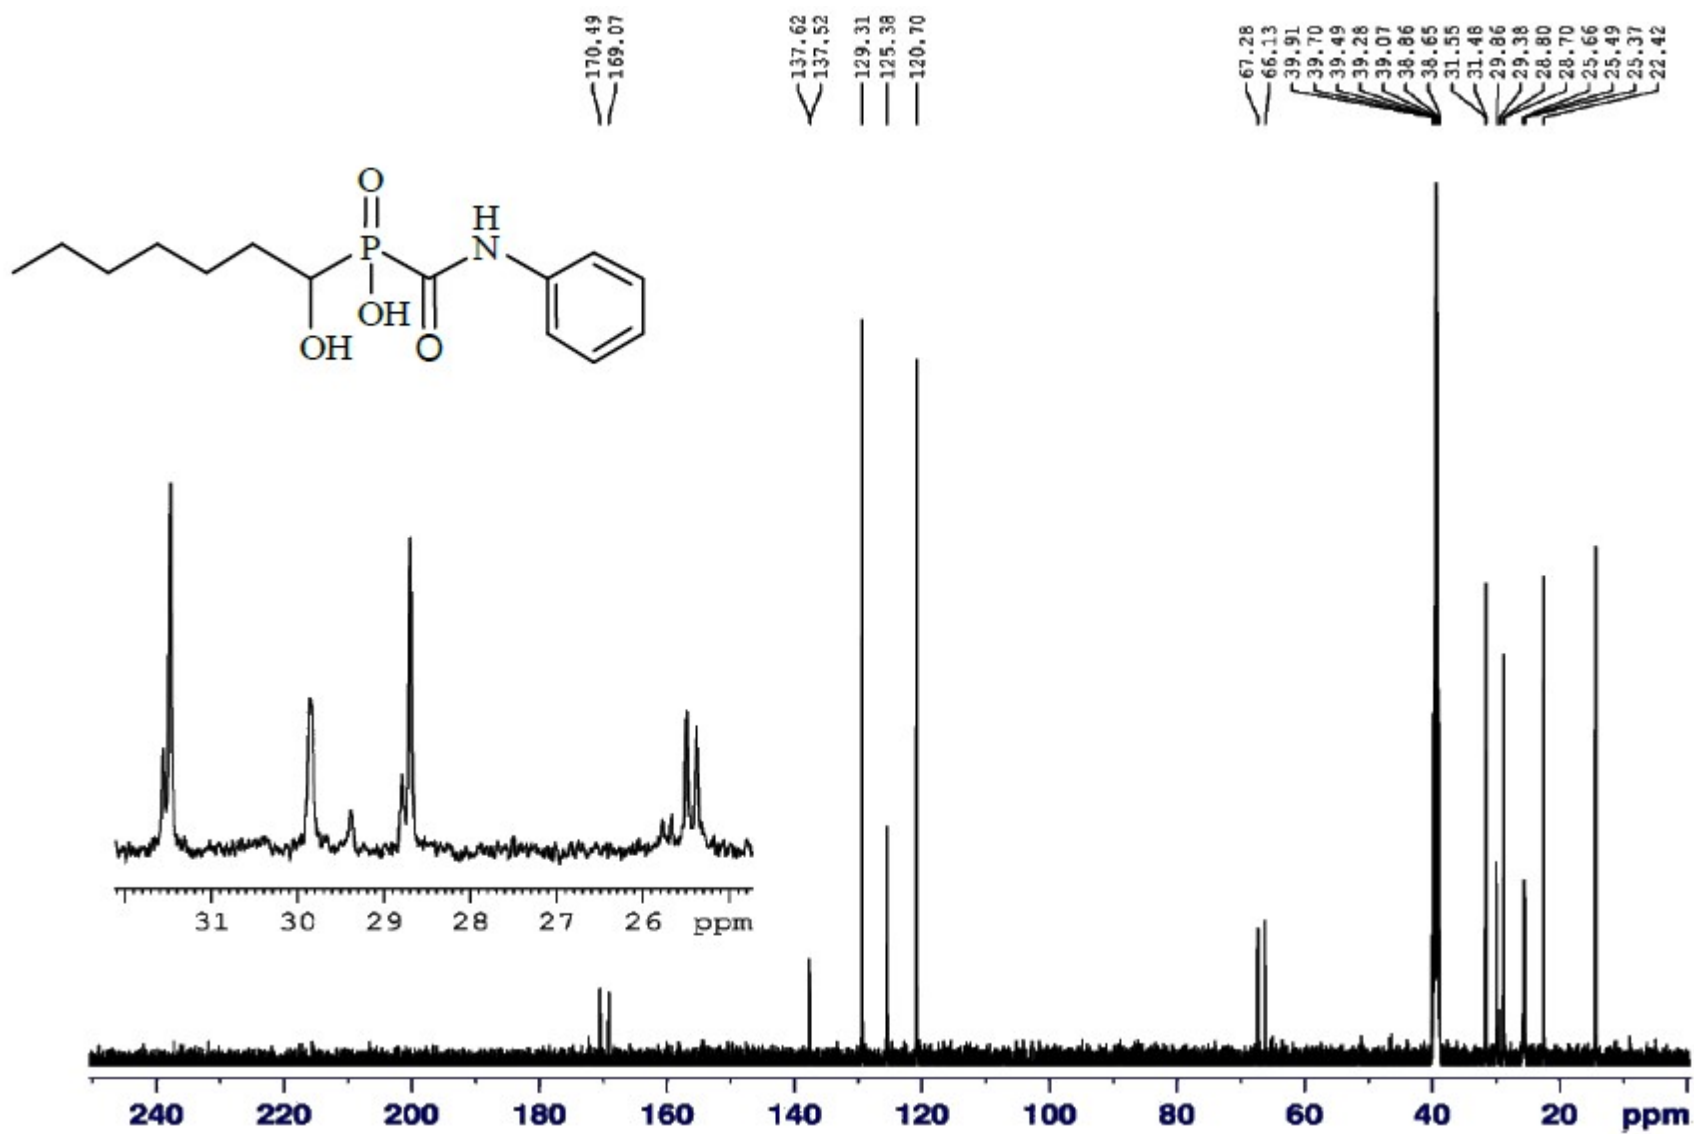

Figure S29: <sup>13</sup>C NMR Spectra of 3j

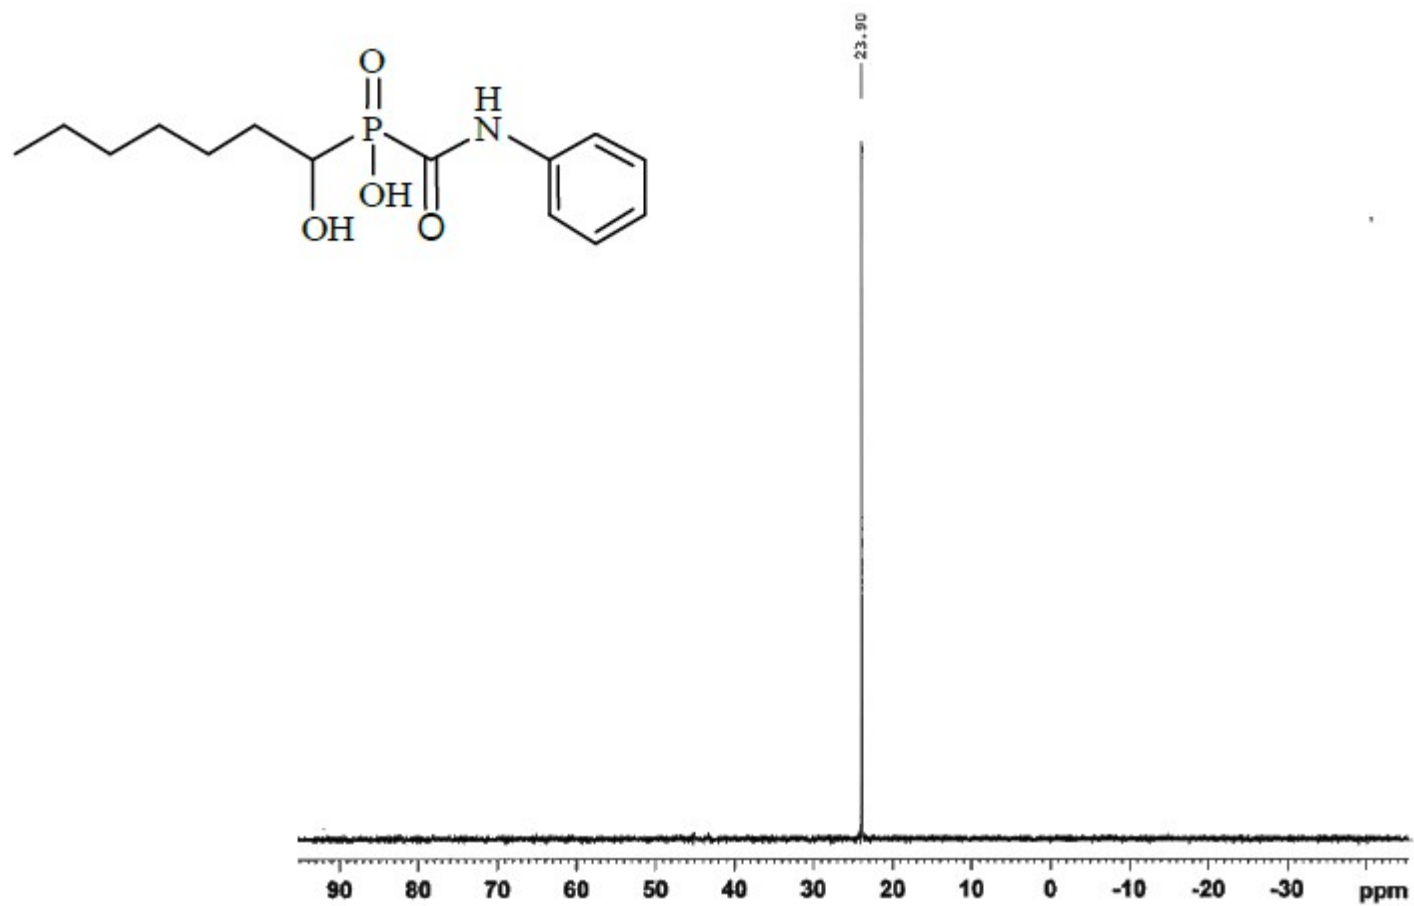

Figure S30:  $^{31}\text{P}$  NMR Spectra of 3j

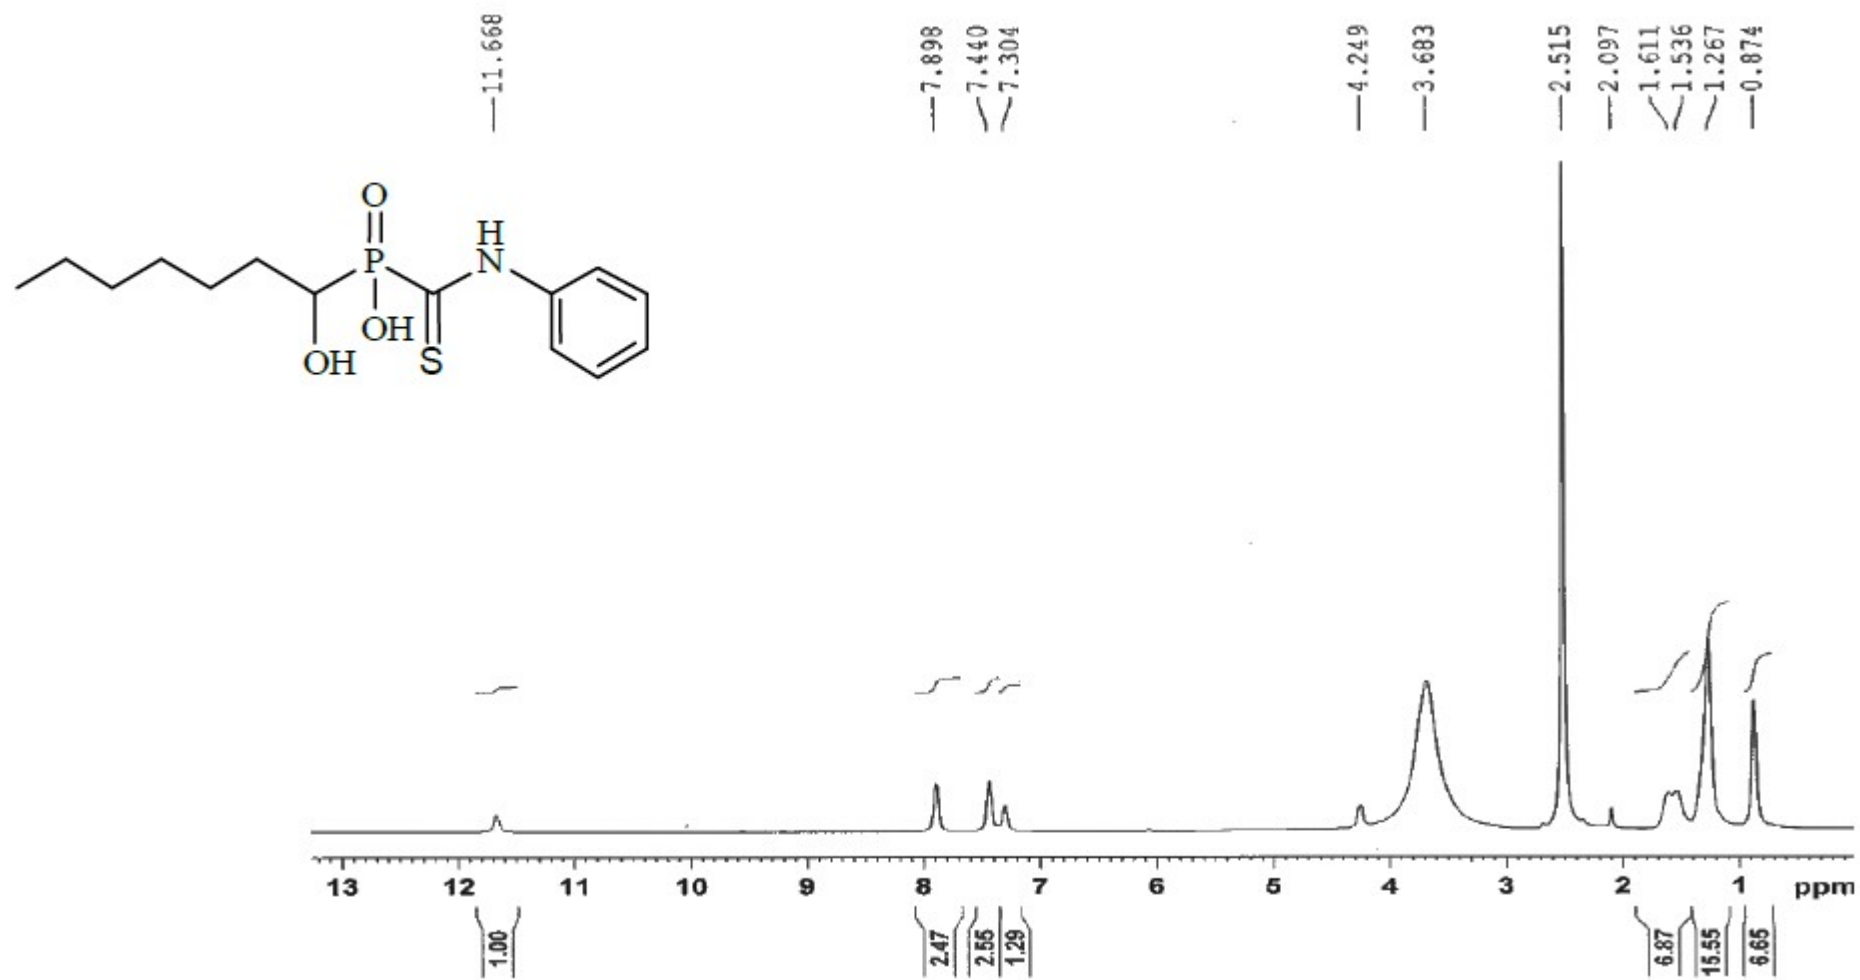

Figure S31: <sup>1</sup>H NMR Spectra of 3k

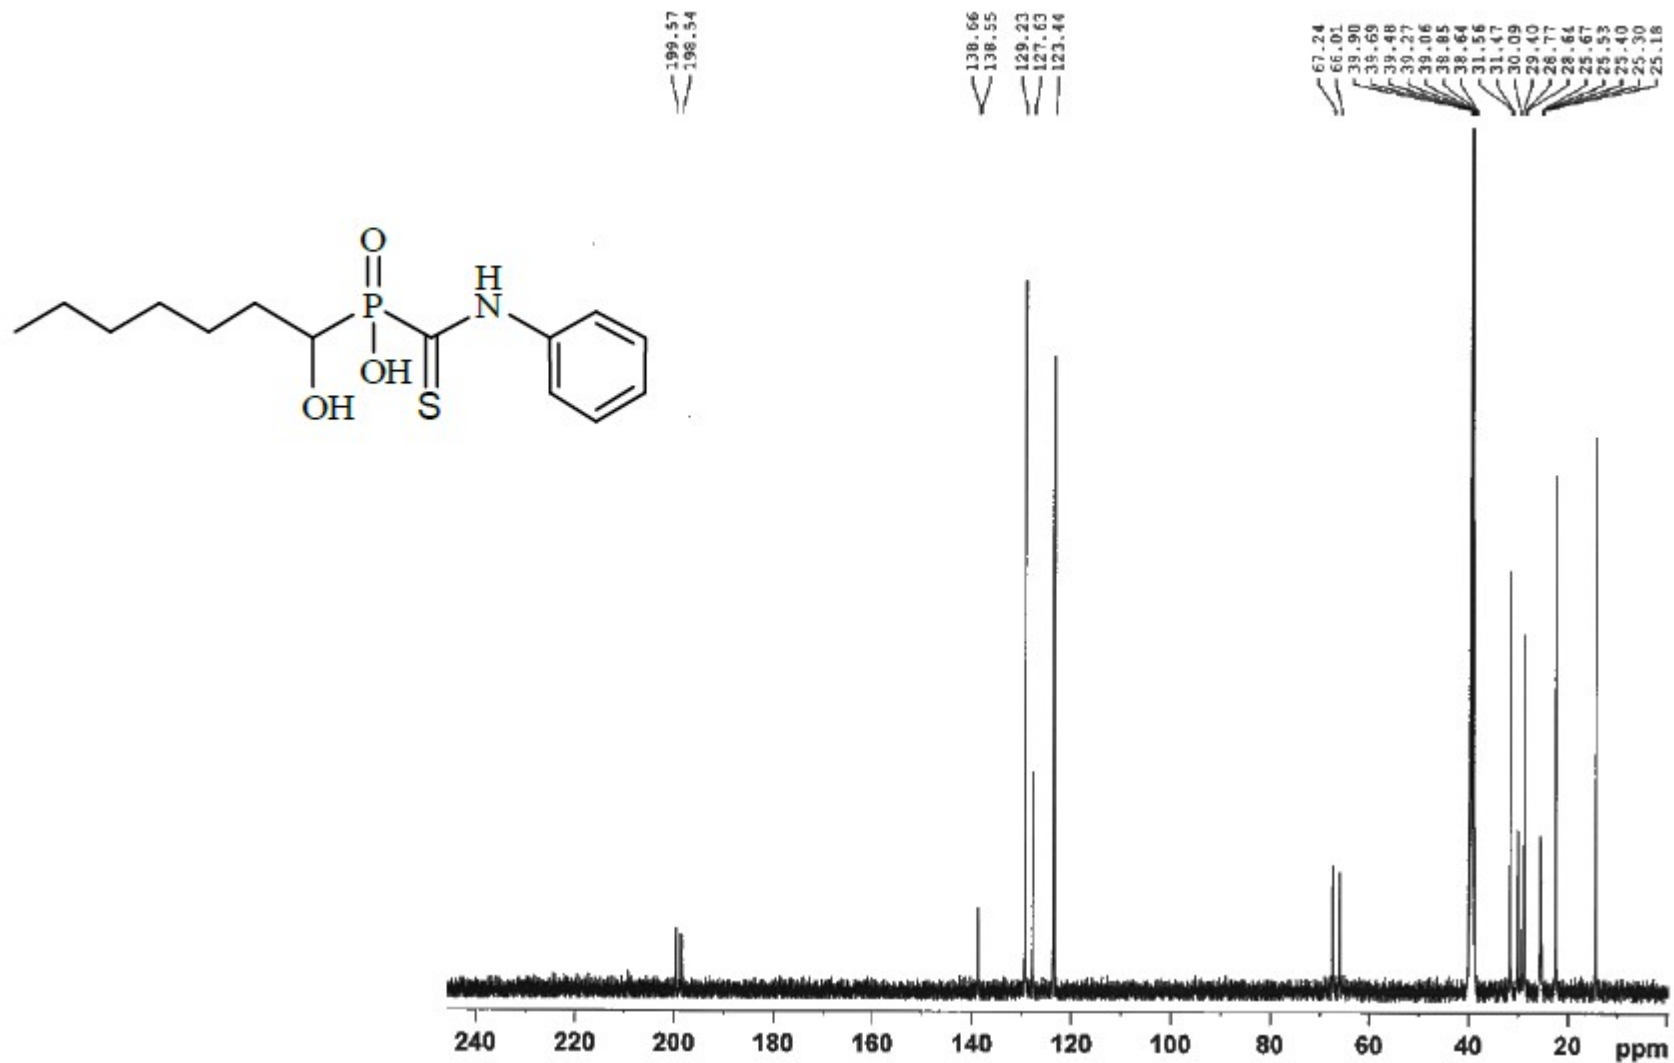

Figure S32: <sup>13</sup>C NMR Spectra of 3k

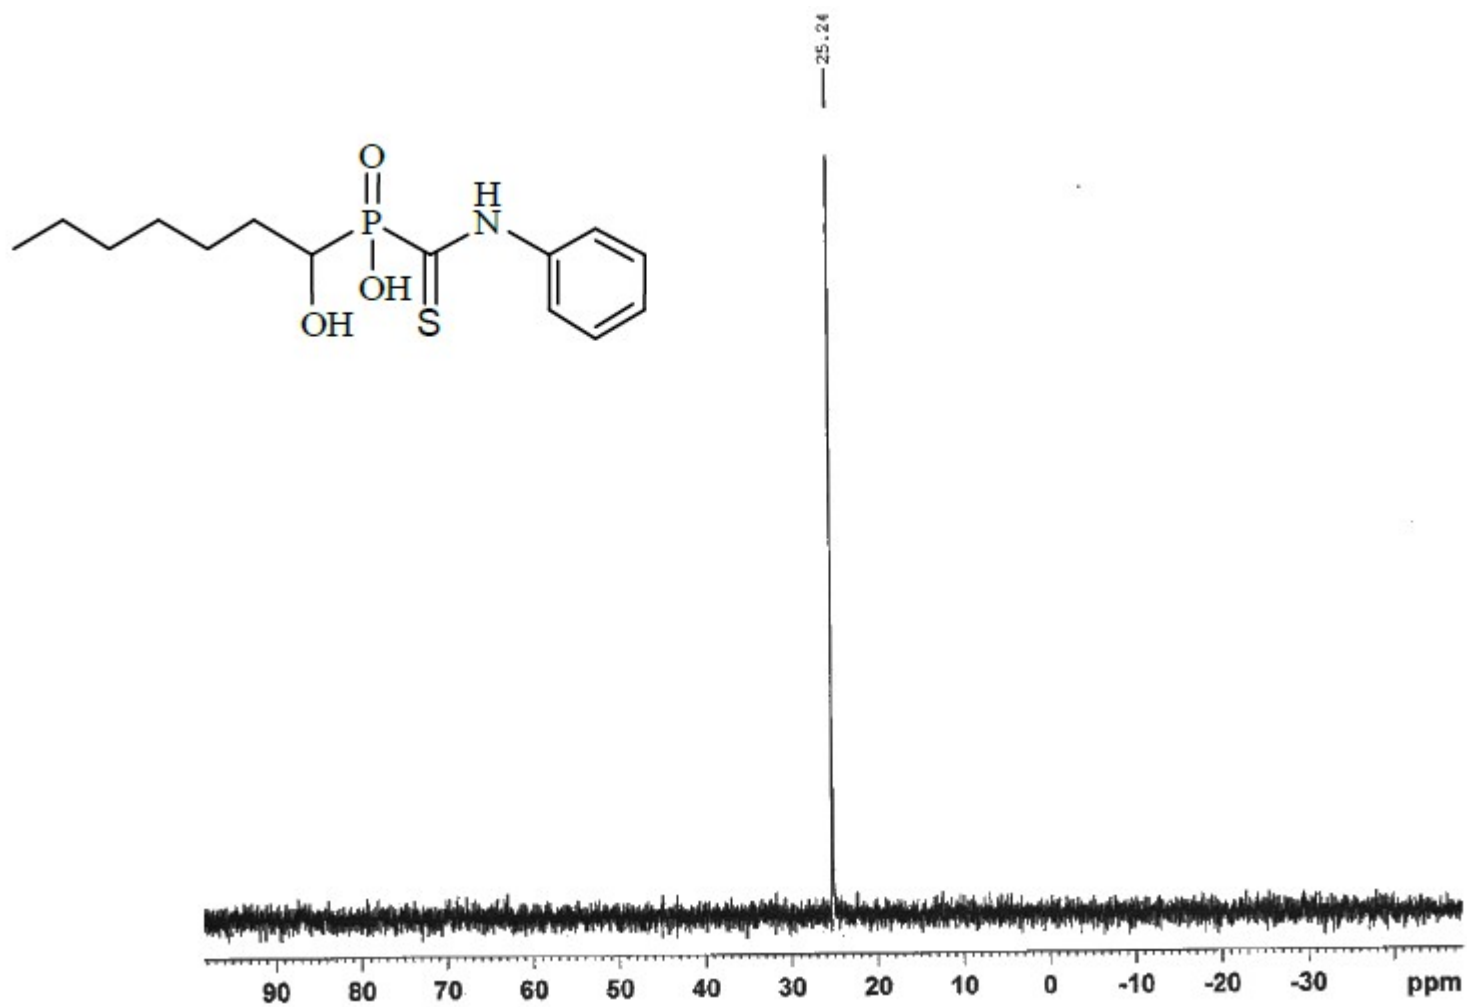

Figure S33:  $^{31}\text{P}$  NMR Spectra of 3k

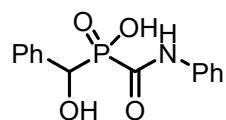

**3a**

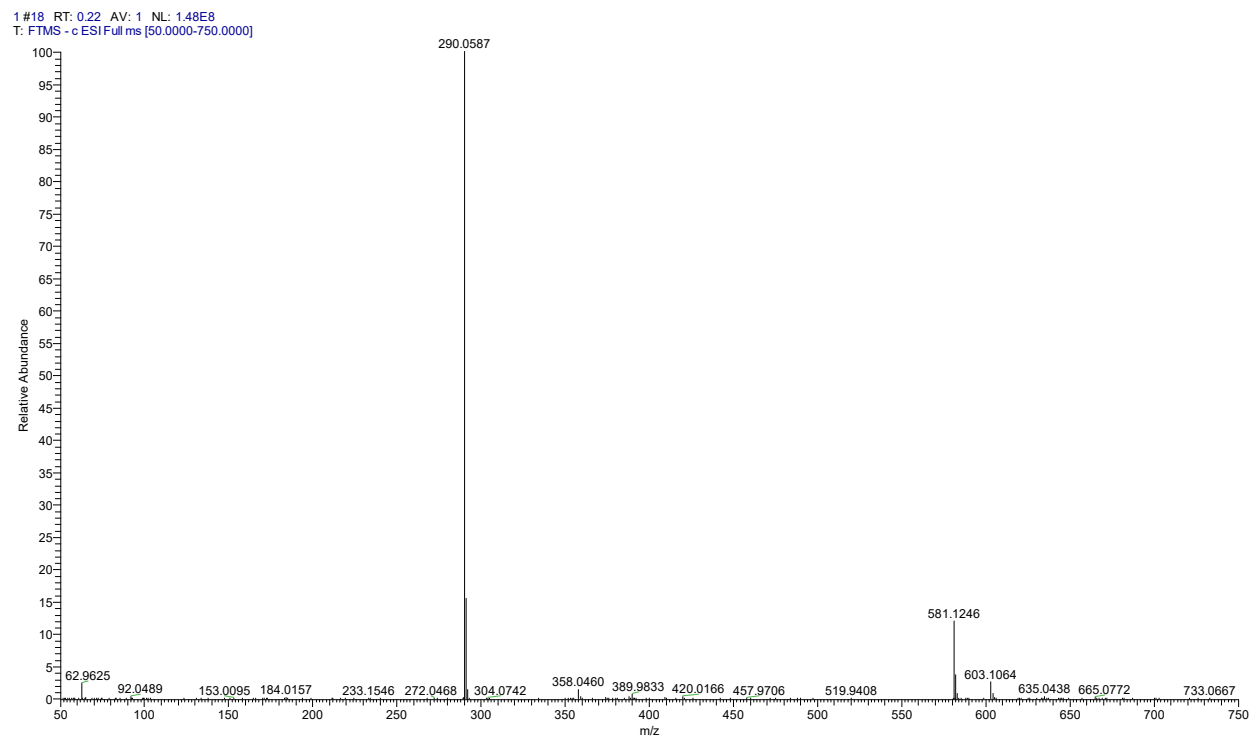

**Figure S34: LCMS of 3a**

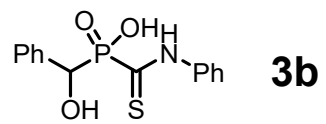

2 #16 RT: 0.19 AV: 1 NL: 9.79E8  
T: FTMS - c ESI Full ms [50.0000-750.0000]

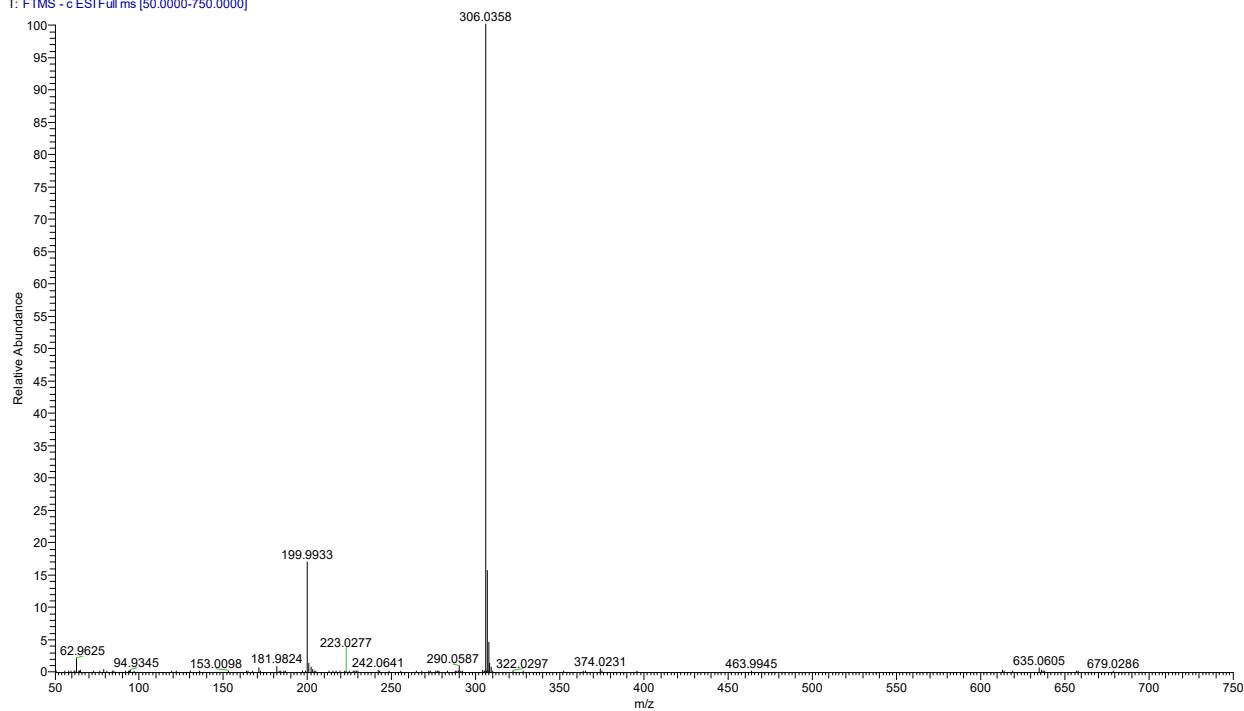

**Figure S35: LCMS of 3b**

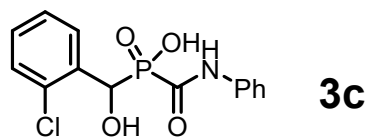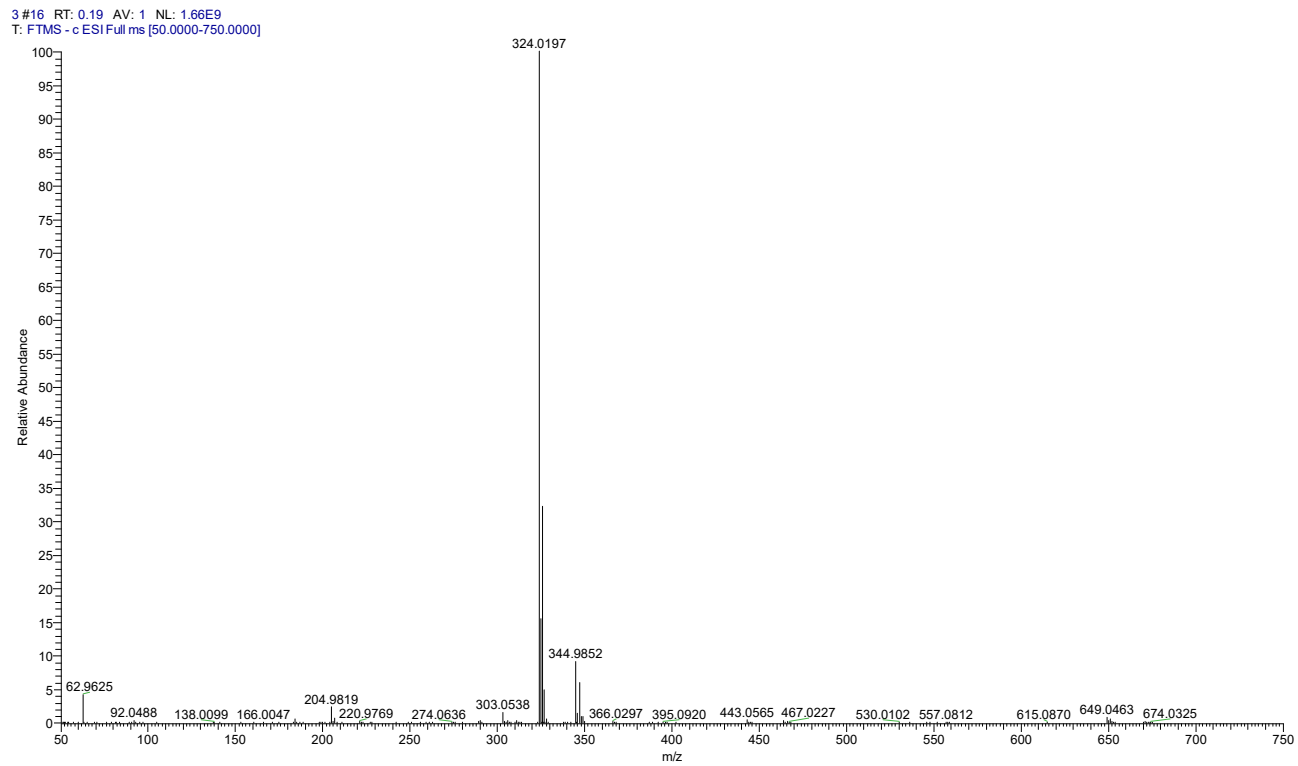

**Figure S36: LCMS of 3c**



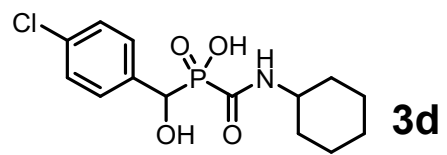

4 #14 RT: 0.16 AV: 1 NL: 7.75E8  
T: FTMS - c ESI Full ms [50.0000-750.0000]

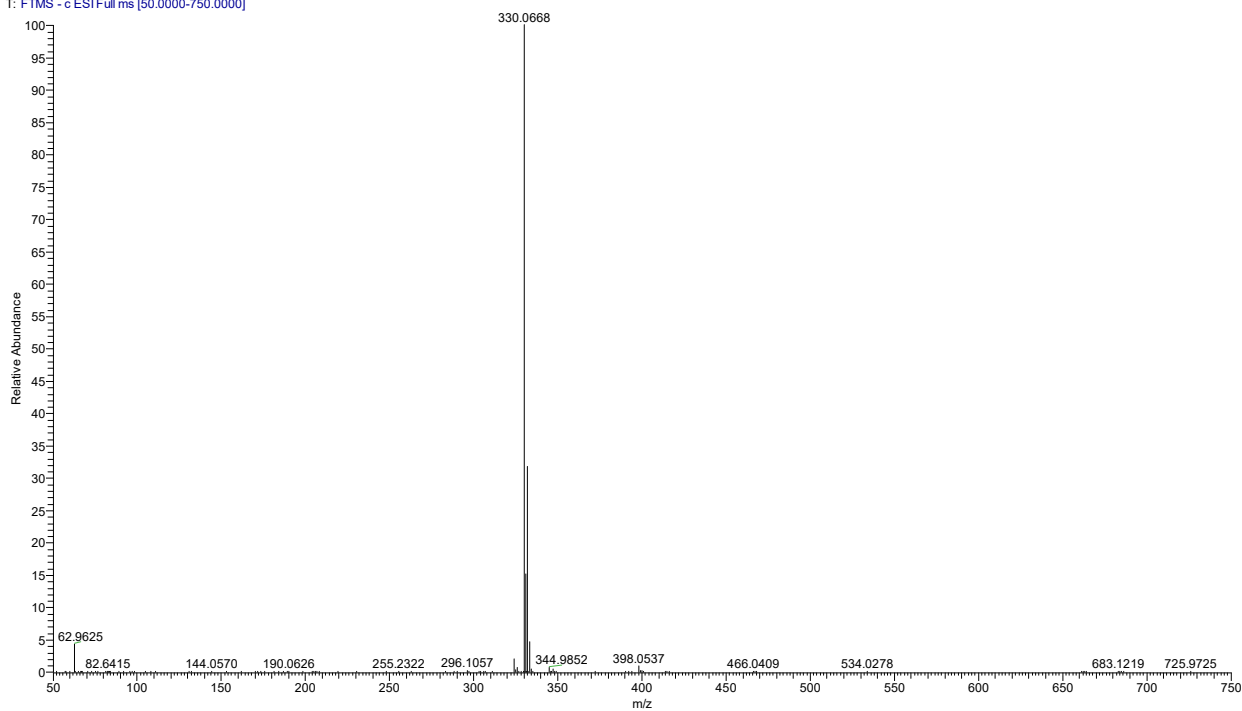

**Figure S37: LCMS of 3d**

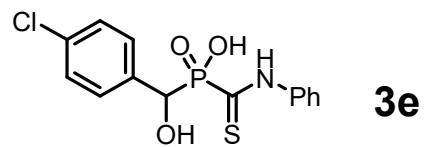

5 #14 RT: 0.16 AV: 1 NL: 1.59E8  
T: FTMS - c ESI Full ms [50.0000-750.0000]

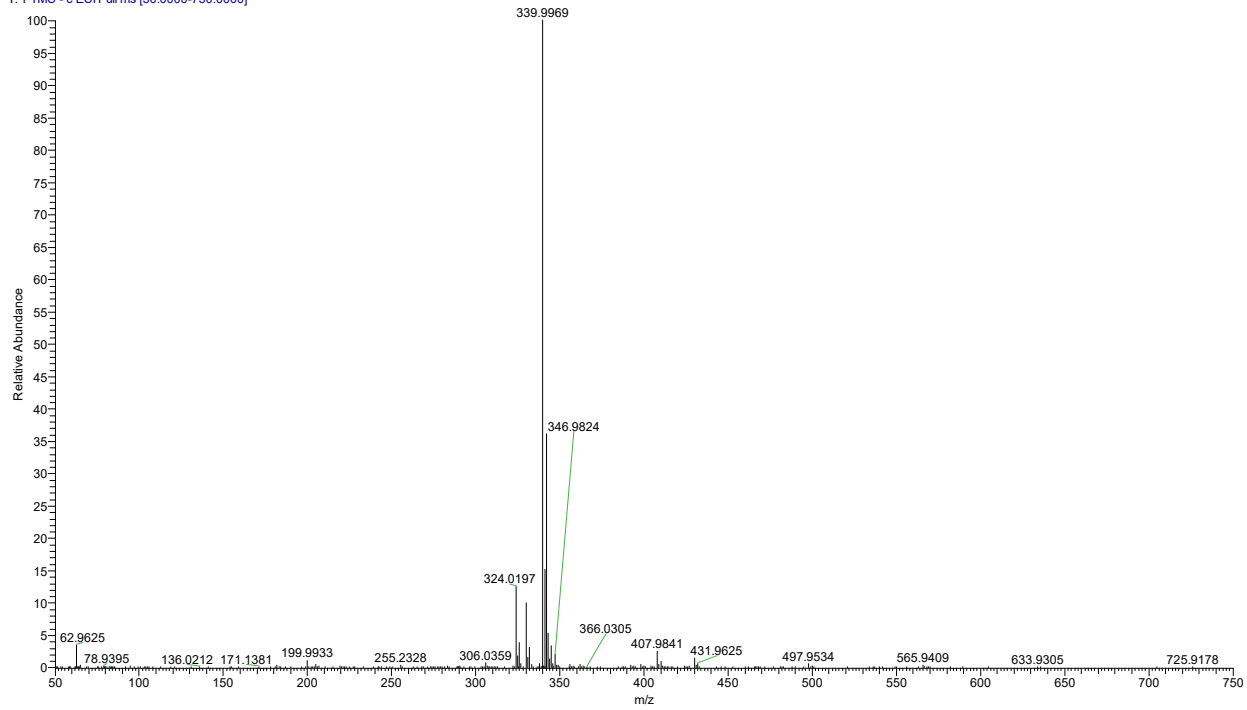

**Figure S38: LCMS of 3e**

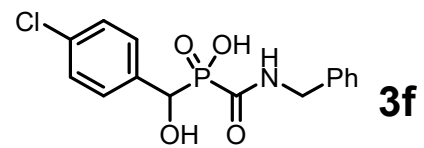

6 #14 RT: 0.16 AV: 1 NL: 1.02E9  
T: FTMS - c ESI Full ms [50.0000-750.0000]

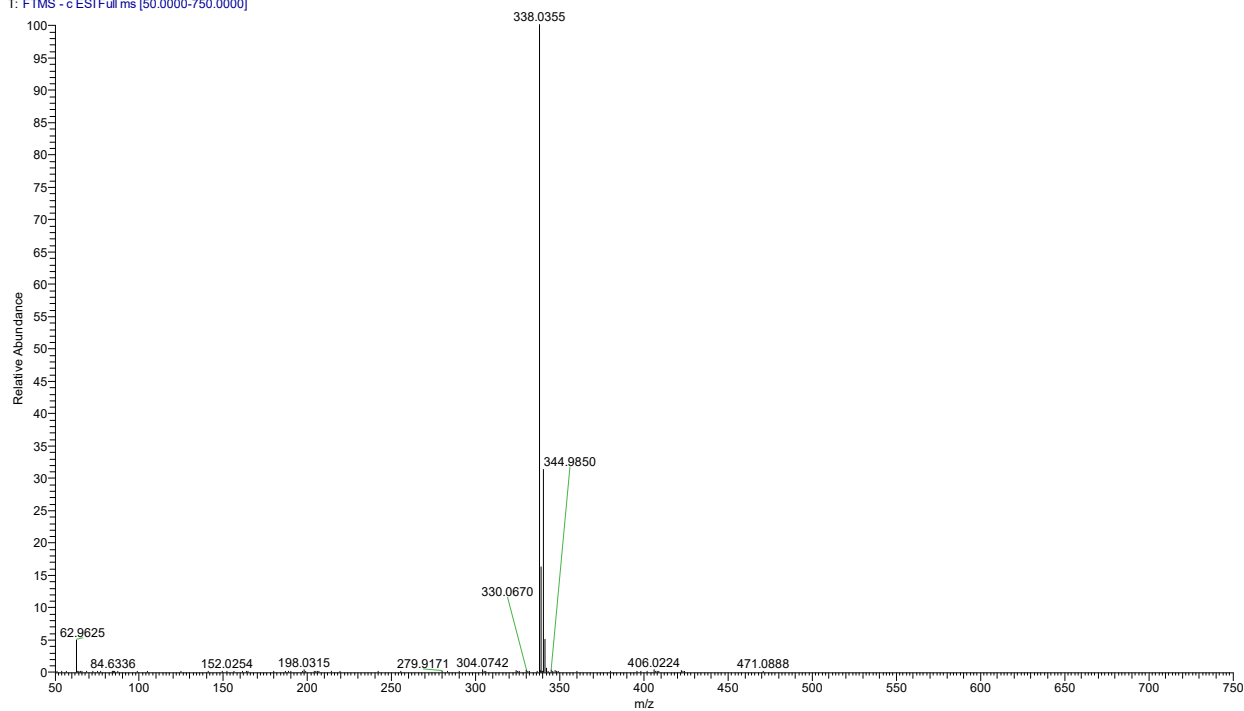

**Figure S39: LCMS of 3f**

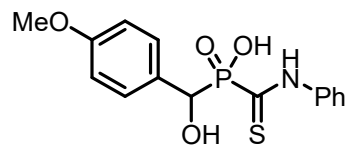

**3g**

7 #28 RT: 0.29 AV: 1 SB: 6 0.06-0.12 NL: 1.51E9  
T: FTMS - c ESI Full ms [50.0000-750.0000]

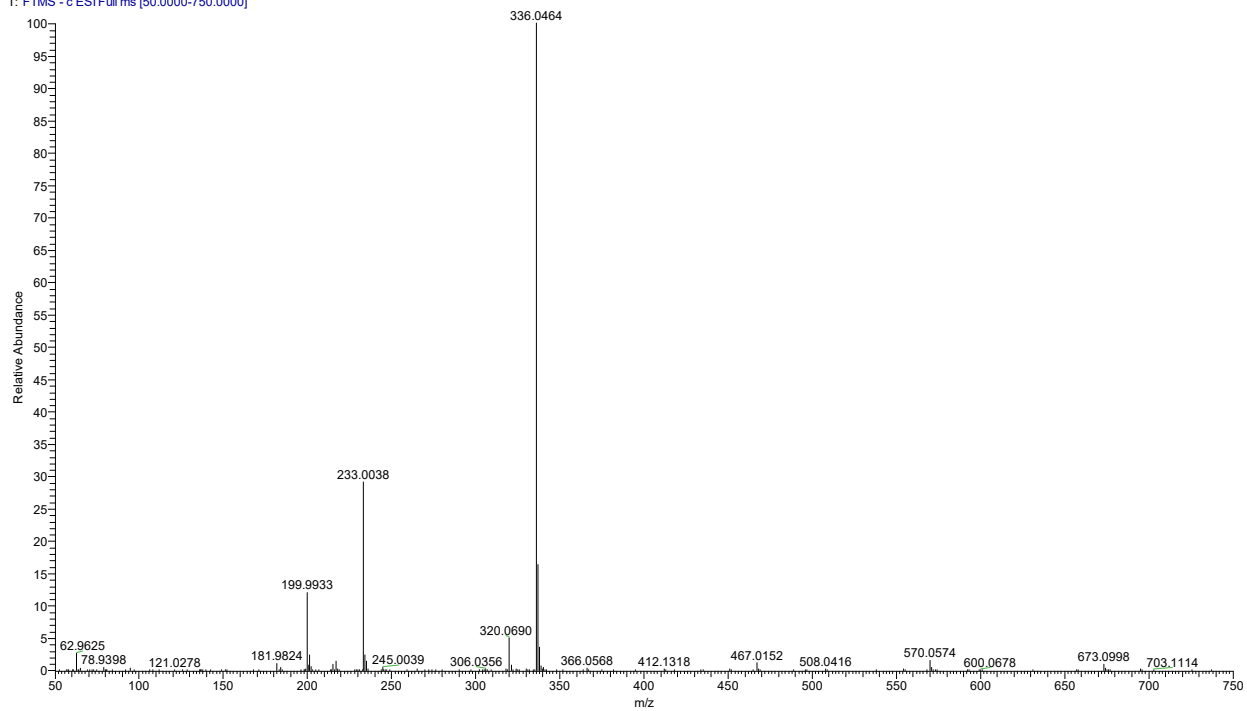

**Figure S40: LCMS of 3g**

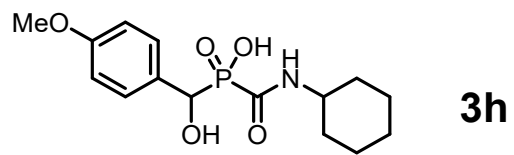

8 #24 RT: 0.26 AV: 1 SB: 9 0.05-0.15 NL: 5.17E7  
T: FTMS - c ESI Full ms [50.0000-750.0000]

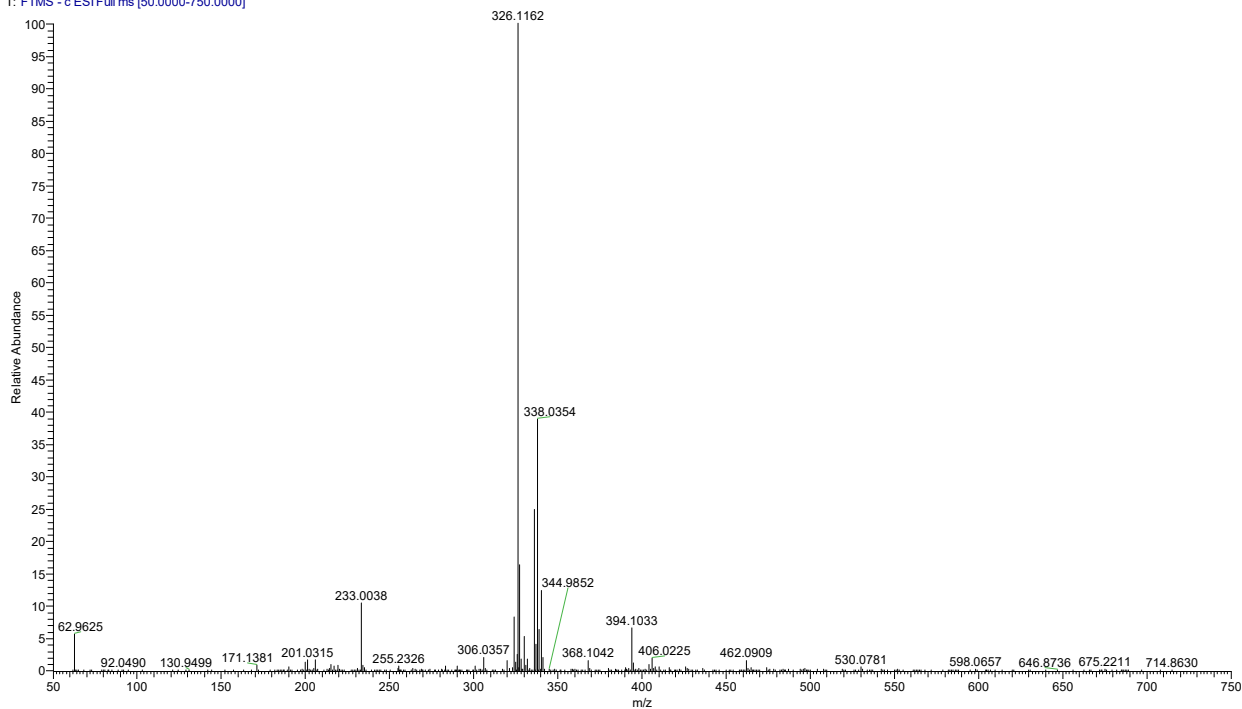

**Figure S41: LCMS of 3h**

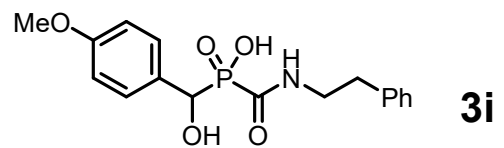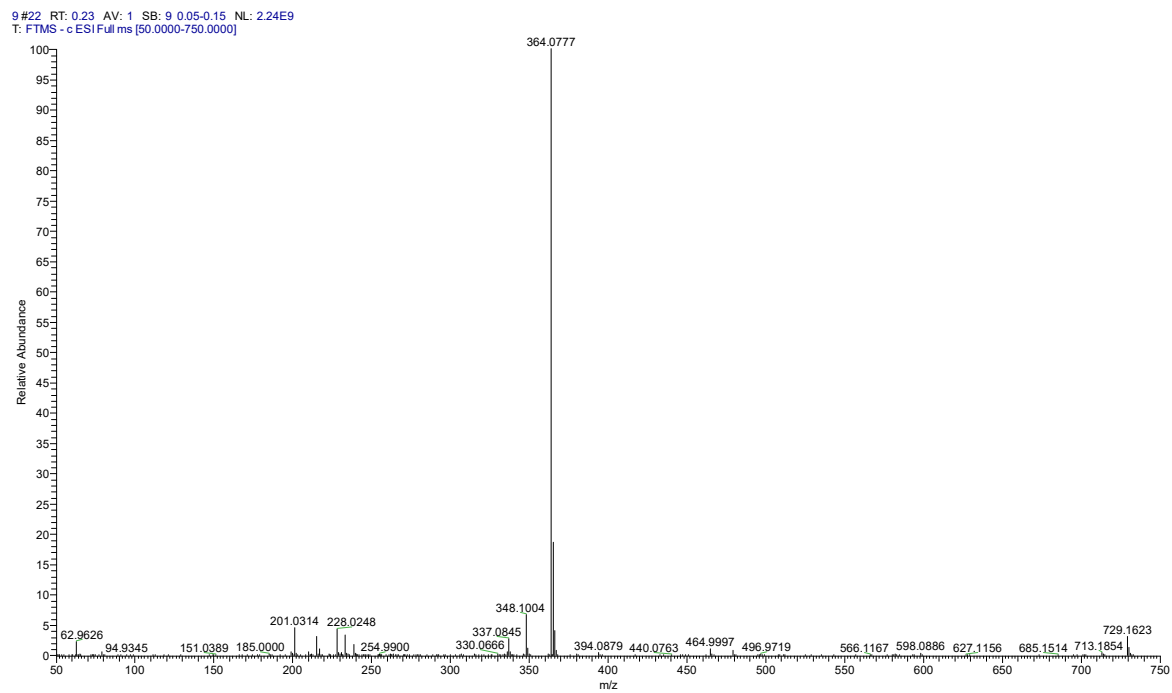

**Figure S42: LCMS of 3i**

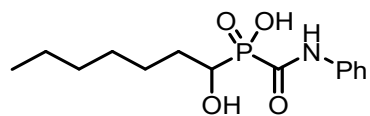

**3j**

10 #22 RT: 0.24 AV: 1 SB: 9 0.05-0.15 NL: 4.57E8  
T: FTMS - c ESI Full ms [50.0000-750.0000]

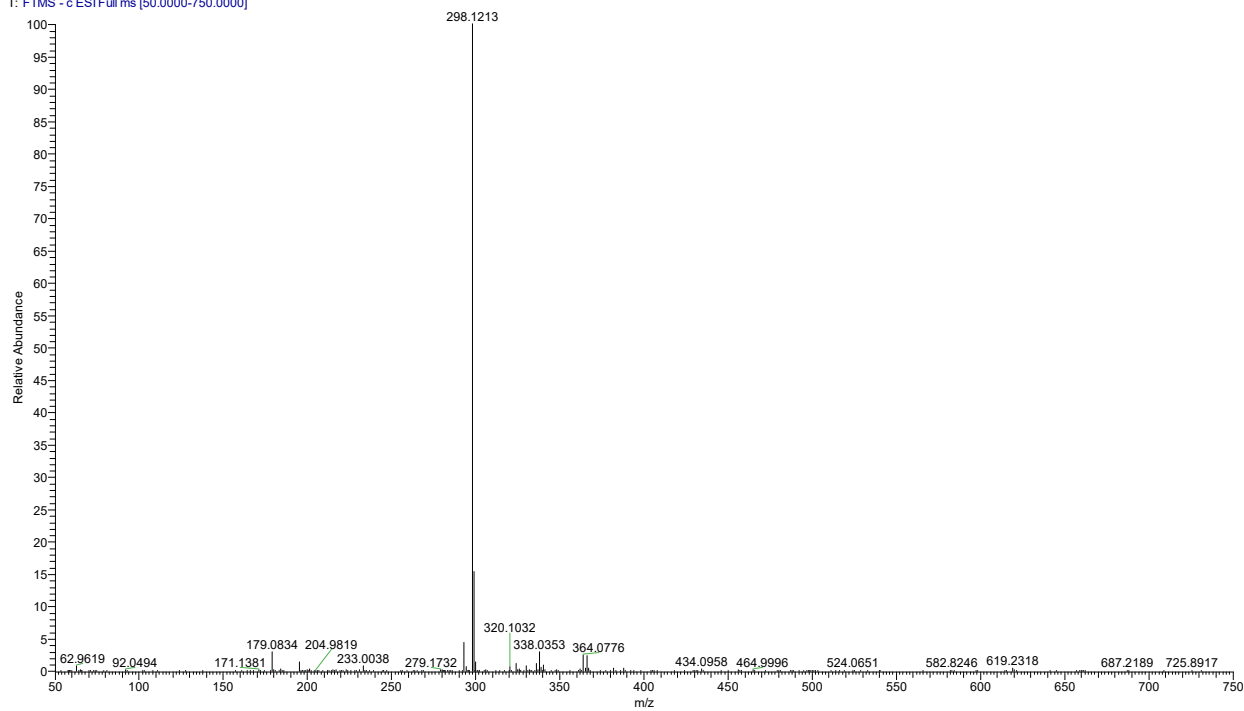

**Figure S43: LCMS of 3j**

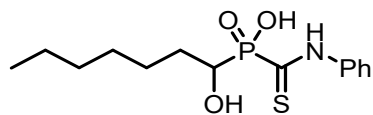

**3k**

11#20 RT: 0.21 AV: 1 SB: 9 0.05-0.14 NL: 2.78E9  
T: FTMS - c ESI Full ms [50.0000-750.0000]

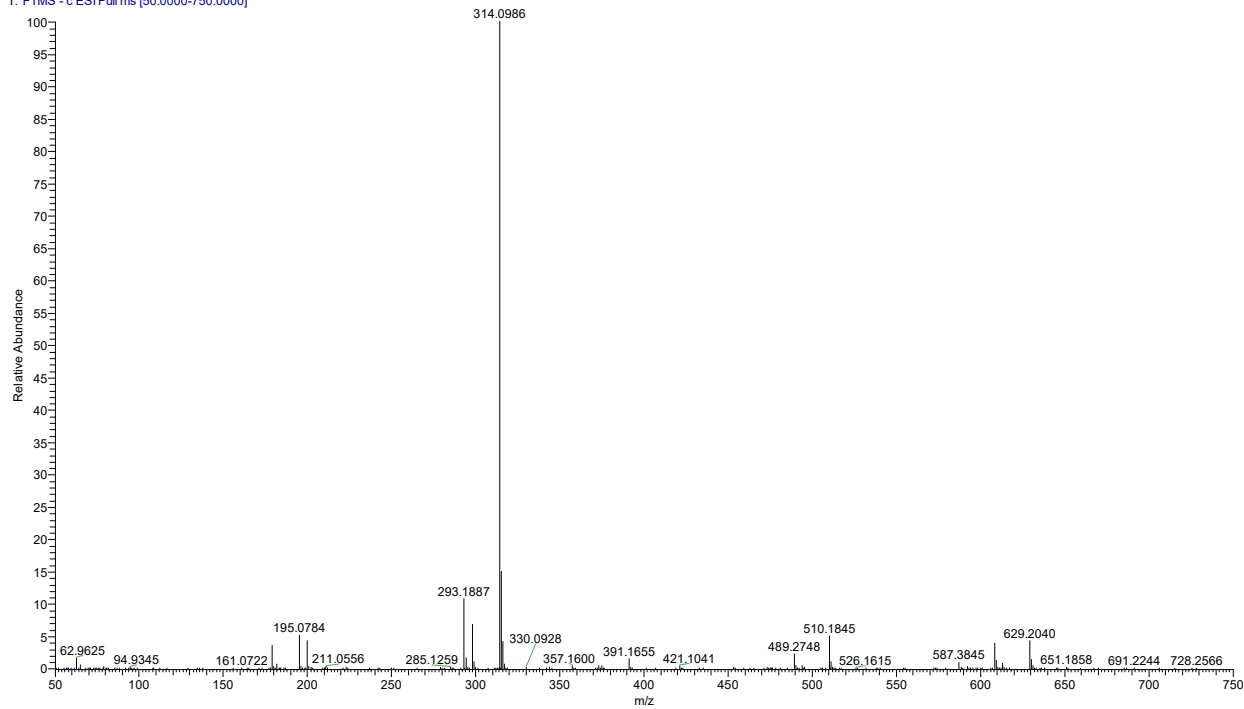

**Figure S44: LCMS of 3k**



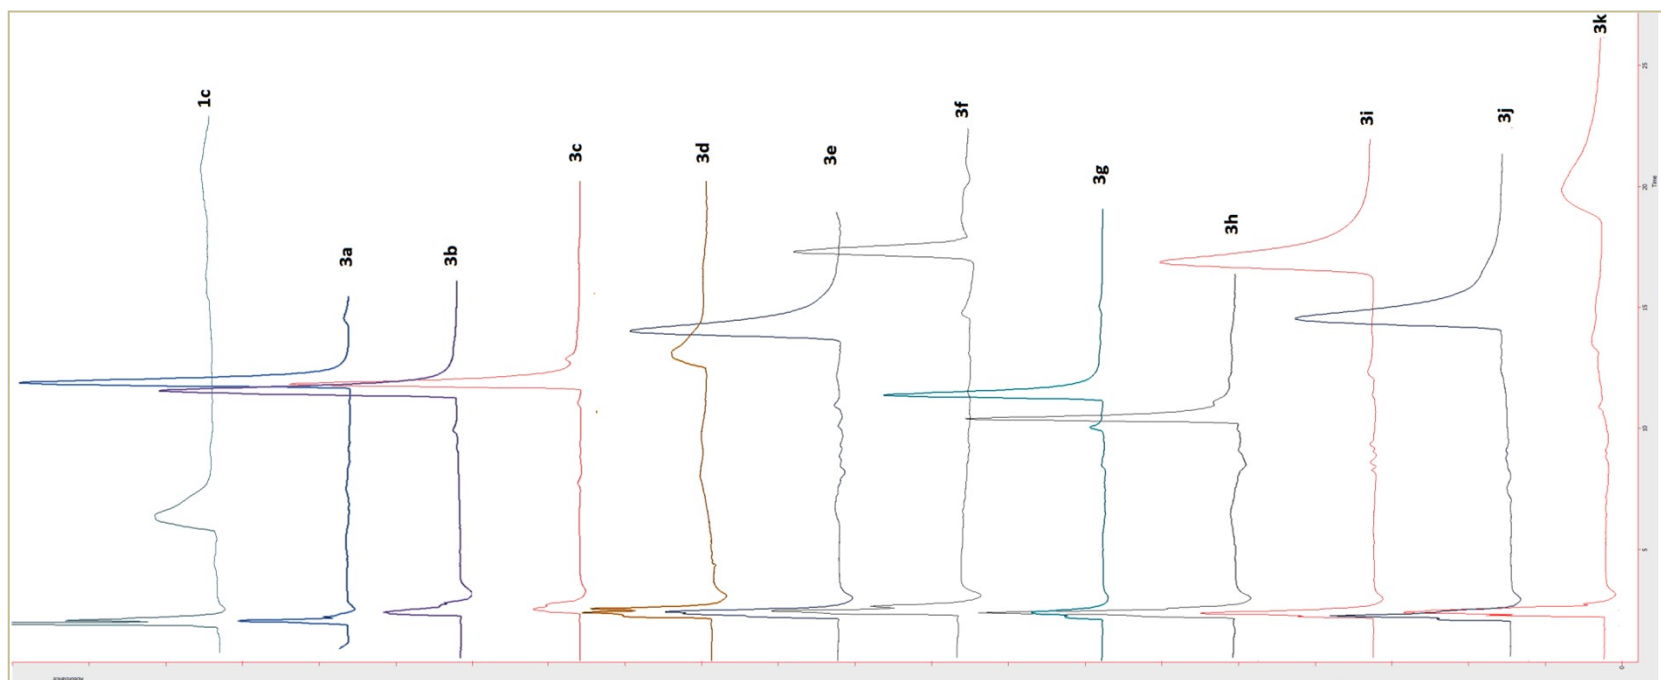

**Figure S45:** HPLC-UV chromatograms of 50 mg L<sup>-1</sup> solutions of the compounds
